# Supplementary material
Source: Royal Society of Chemistry journal article supplement (https://www.rsc.org/suppdata/p2/1999/1317/902184a.pdf)
Supplement: Supplementary file 1 [file 902184a.pdf]

Supplementary material and supporting information for

PREDICTIONS OF  $^{13}\text{C}$  CHEMICAL SHIFTS IN CARBOCATIONS.  
THE USE OF SCALED CHEMICAL SHIFTS CALCULATED USING GIAO  
DFT METHODS.

Valerije Vrcek and Olga Kronja\*

Faculty of Pharmacy and Biochemistry, University of Zagreb, 10000 Zagreb,  
Croatia

Hans-Ullrich Siehl\*

Division of Organic Chemistry I, University of Ulm, D-89069 Ulm, Germany

## Structures for table S1 and S2

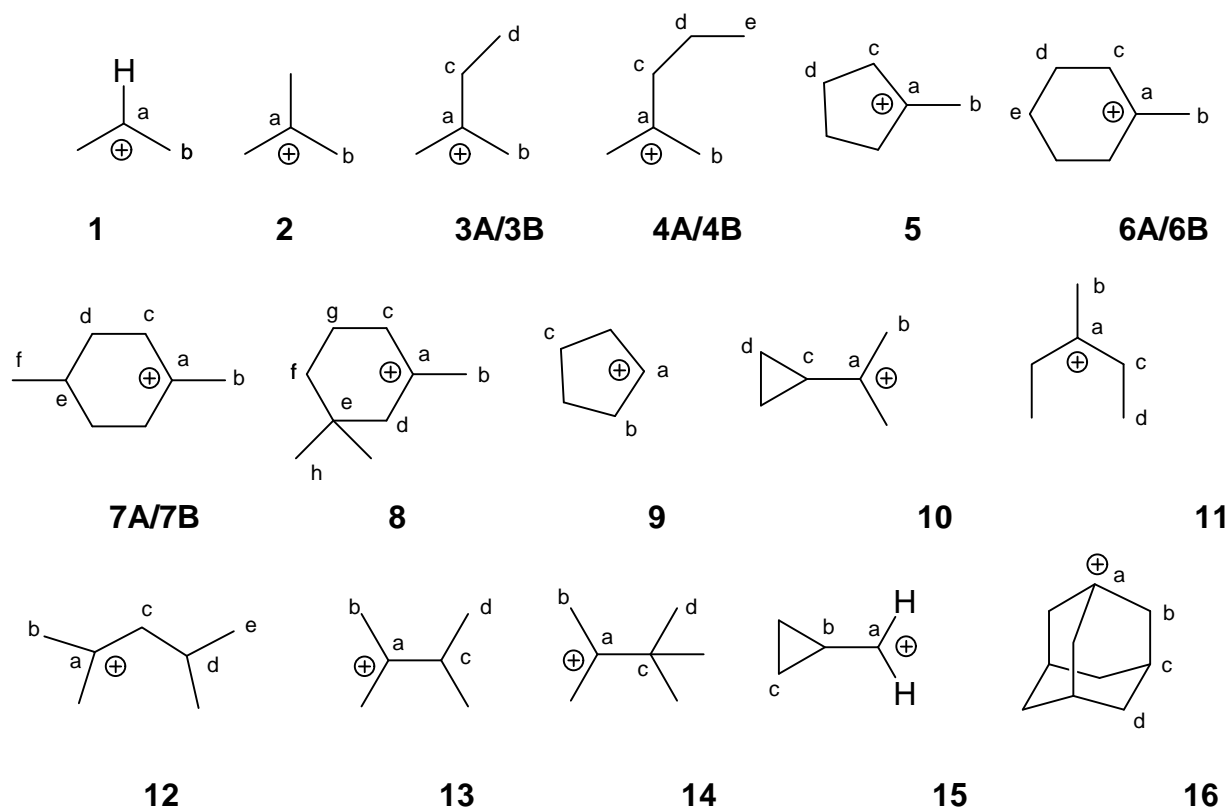

Table S1. Experimental<sup>a</sup> and Calculated <sup>13</sup>C NMR Shifts GIAO-B3LYP/6-311G(d,p)// B3LYP-6/31G(d) and GIAO-B3LYP/6-311G(d,p)// MP2/6-31G(d). Calculations for C-H Hyperconjugative Isomers of Carbocations (Group **A**).

| carbocation | carbon atom | $d_{\text{calc}}/\text{ppm}$<br>DFT <sup>b</sup> | $d_{\text{calc}}/\text{ppm}$<br>MP <sup>c</sup> | $d_{\text{exp}}/\text{ppm}$ | $d_{\text{exp}}/d_{\text{calc}}$<br>DFT | $d_{\text{exp}}/d_{\text{calc}}$<br>MP |
|-------------|-------------|--------------------------------------------------|-------------------------------------------------|-----------------------------|-----------------------------------------|----------------------------------------|
| <b>1</b>    | a           | 339.10                                           | 333.51                                          | 320.6                       | 0.95                                    | 0.96                                   |
|             | b           | 57.40                                            | 58.20                                           | 51.5                        | 0.90                                    | 0.88                                   |
| <b>2</b>    | a           | 351.73                                           | 346.00                                          | 335                         | 0.95                                    | 0.97                                   |
|             | b           | 52.12                                            | 51.51                                           | 47.5                        | 0.91                                    | 0.92                                   |
| <b>3A</b>   | a           | 353.59                                           | 350.46                                          | 335.4                       | 0.95                                    | 0.96                                   |
|             | b           | 49.37                                            | 51.78                                           | 44.6                        | 0.90                                    | 0.86                                   |
|             | c           | 65.87                                            | 65.67                                           | 57.5                        | 0.87                                    | 0.88                                   |
|             | d           | 12.00                                            | 12.26                                           | 9.3                         | 0.78                                    | 0.76                                   |
| <b>4A</b>   | a           | 350.88                                           | 347.91                                          | 333.4                       | 0.95                                    | 0.96                                   |
|             | b           | 49.28                                            | 48.89                                           | 45.0                        | 0.91                                    | 0.92                                   |
|             | c           | 74.30                                            | 73.60                                           | 64.4                        | 0.91                                    | 0.88                                   |
|             | d           | 25.20                                            | 24.78                                           | 20.9                        | 0.83                                    | 0.84                                   |
|             | e           | 13.94                                            | 13.84                                           | 12.6                        | 0.90                                    | 0.91                                   |
| <b>5</b>    | a           | 354.35                                           | 350.52                                          | 336.9                       | 0.95                                    | 0.96                                   |
|             | b           | 41.54                                            | 41.62                                           | 36.7                        | 0.88                                    | 0.88                                   |
|             | c           | 70.15                                            | 70.09                                           | 63.3                        | 0.90                                    | 0.90                                   |
|             | d           | 31.62                                            | 31.75                                           | 26.4                        | 0.83                                    | 0.83                                   |
| <b>6</b>    | a           | 350.92                                           | 346.91                                          | 332.7                       | 0.95                                    | 0.96                                   |
|             | b           | 50.76                                            | 50.83                                           | 44.2                        | 0.87                                    | 0.87                                   |
|             | c           | 64.69                                            | 64.66                                           | 58.2                        | 0.90                                    | 0.90                                   |
|             | d           | 32.98                                            | 31.64                                           | 26.9                        | 0.82                                    | 0.85                                   |
|             | e           | 26.44                                            | 26.52                                           | 22.2                        | 0.84                                    | 0.84                                   |
| <b>7</b>    | a           | 348.97                                           | 344.77                                          | 328.7                       | 0.94                                    | 0.95                                   |
|             | b           | 49.57                                            | 49.64                                           | 43.6                        | 0.88                                    | 0.88                                   |
|             | c           | 63.84                                            | 63.68                                           | 56.4                        | 0.88                                    | 0.89                                   |
|             | d           | 46.86                                            | 44.37                                           | 35.8                        | 0.76                                    | 0.81                                   |
|             | e           | 38.85                                            | 36.33                                           | 29.5                        | 0.76                                    | 0.81                                   |
|             | f           | 28.61                                            | 29.11                                           | 27.3                        | 0.95                                    | 0.94                                   |
| <b>8</b>    | a           | 346.89                                           | 343.73                                          | 329.0                       | 0.95                                    | 0.96                                   |
|             | b           | 48.50                                            | 49.08                                           | 46.2                        | 0.94                                    | 0.94                                   |
|             | c           | 80.40                                            | 79.48                                           | 69.7                        | 0.87                                    | 0.88                                   |
|             | d           | 65.55                                            | 65.13                                           | 58.6                        | 0.89                                    | 0.90                                   |
|             | e           | 31.86                                            | 34.52                                           | 26.1                        | 0.82                                    | 0.76                                   |
|             | f           | 42.98                                            | 44.13                                           | 35.0                        | 0.81                                    | 0.79                                   |
|             | g           | 74.88                                            | 75.86                                           | 43.5                        | 0.58                                    | 0.57                                   |
|             | h           | 35.62                                            | 35.62                                           | 29.1                        | 0.82                                    | 0.82                                   |
| <b>9</b>    | a           | 336.15                                           | 330.20                                          | 320.0                       | 0.95                                    | 0.97                                   |
|             | b           | 76.46                                            | 76.69                                           | 71.0                        | 0.92                                    | 0.92                                   |
|             | c           | 31.39                                            | 31.43                                           | 28.0                        | 0.89                                    | 0.89                                   |
| <b>10</b>   | a           | 294.19                                           | 290.17                                          | 279.3                       | 0.95                                    | 0.96                                   |
|             | b           | 37.73                                            | 37.39                                           | 34.1                        | 0.90                                    | 0.91                                   |
|             | c           | 61.87                                            | 61.44                                           | 57.3                        | 0.94                                    | 0.93                                   |
|             | d           | 60.51                                            | 61.35                                           | 54.15                       | 0.89                                    | 0.88                                   |

<sup>a</sup> Experimental chemical shifts are taken from Ref. 10.a. (**1**, **2**, **3A** and **4A**), Ref. 13 (**5**), Ref. 14 (**6**), ref. 15 (**7**, **8**), Ref. 16 (**9**) and Ref. 17 (**10**).

<sup>b</sup> Calculated <sup>13</sup>C NMR shifts from GIAO-B3LYP/6-311G(d,p)// B3LYP-6/31G(d) method.

<sup>c</sup> Calculated <sup>13</sup>C NMR shifts from GIAO-B3LYP/6-311G(d,p)// MP2-6/31G(d) method.

Table S2. Experimental<sup>a</sup> and Calculated <sup>13</sup>C NMR Shifts from GIAO B3LYP/6-311G(d,p)// B3LYP-6/31G(d) and from GIAO B3LYP/6-311G(d,p)//MP2-6/31G(d) Calculations for C-C Hyperconjugative Isomers of Carbocations (Group **B**).

| carbocation | carbon atom | $d_{\text{calc}}/\text{ppm}$<br>DFT | $d_{\text{calc}}/\text{ppm}$<br>MP | $d_{\text{exp}}/\text{ppm}$ | $d_{\text{exp}}/d_{\text{calc}}$<br>DFT | $d_{\text{exp}}/d_{\text{calc}}$<br>MP |
|-------------|-------------|-------------------------------------|------------------------------------|-----------------------------|-----------------------------------------|----------------------------------------|
| <b>3B</b>   | a           | 344.90                              | 333.06                             | 335.4                       | 0.97                                    | 1.01                                   |
|             | b           | 48.17                               | 46.98                              | 44.6                        | 0.93                                    | 0.95                                   |
|             | c           | 63.05                               | 62.83                              | 57.5                        | 0.91                                    | 0.92                                   |
|             | d           | 25.99                               | 23.96                              | 9.3                         | 0.36                                    | 0.39                                   |
| <b>4B</b>   | a           | 343.98                              | 319.17                             | 333.4                       | 0.97                                    | 1.04                                   |
|             | b           | 46.92                               | 44.74                              | 45.0                        | 0.95                                    | 1.01                                   |
|             | c           | 73.52                               | 73.53                              | 64.4                        | 0.88                                    | 0.88                                   |
|             | d           | 47.47                               | 44.16                              | 20.9                        | 0.53                                    | 0.47                                   |
|             | e           | 23.73                               | 23.83                              | 12.6                        | 0.44                                    | 0.53                                   |
| <b>11</b>   | a           | 345.51                              | 334.30                             | 336.4                       | 0.97                                    | 1.01                                   |
|             | b           | 45.24                               | 43.80                              | 41.9                        | 0.92                                    | 0.96                                   |
|             | c           | 59.51                               | 58.69                              | 54.5                        | 0.91                                    | 0.93                                   |
|             | d           | 13.79                               | 24.64                              | 8.9                         | 0.65                                    | 0.36                                   |
| <b>12</b>   | a           | 337.8                               | 331.70                             | 332.1                       | 0.98                                    | 1.00                                   |
|             | b           | 48.07                               | 47.55                              | 45.4                        | 0.94                                    | 0.95                                   |
|             | c           | 80.04                               | 79.44                              | 70.1                        | 0.88                                    | 0.88                                   |
|             | d           | 67.54                               | 63.52                              | 31.4                        | 0.47                                    | 0.49                                   |
|             | e           | 29.67                               | 25.20                              | 21.7                        | 0.73                                    | 0.86                                   |
| <b>13</b>   | a           | 343.12                              | 330.69                             | 335                         | 0.97                                    | 1.01                                   |
|             | b           | 45.78                               | 44.37                              | 43                          | 0.94                                    | 0.97                                   |
|             | c           | 66.67                               | 62.65                              | 59                          | 0.89                                    | 0.94                                   |
|             | d           | 27.16                               | 26.56                              | 17                          | 0.63                                    | 0.64                                   |
| <b>14</b>   | a           | 342.00                              | 323.97                             | 330                         | 0.97                                    | 1.02                                   |
|             | b           | 45.17                               | 42.99                              | 41                          | 0.91                                    | 0.95                                   |
|             | c           | 68.45                               | 67.87                              | 56                          | 0.82                                    | 0.83                                   |
|             | d           | 32.41                               | 31.96                              | n.a.                        | -                                       | -                                      |
| <b>15</b>   | a           | 242.69                              | 245.08                             | 235                         | 0.97                                    | 0.96                                   |
|             | b           | 80.35                               | 86.22                              | n.a.                        | -                                       | -                                      |
|             | c           | 84.49                               | 85.09                              | n.a.                        | -                                       | -                                      |
| <b>16</b>   | a           | 310.60                              | 305.89                             | 300                         | 0.97                                    | 0.98                                   |
|             | b           | 72.54                               | 71.50                              | 65.7                        | 0.91                                    | 0.92                                   |
|             | c           | 102.63                              | 100.23                             | 86.8                        | 0.85                                    | 0.87                                   |
|             | d           | 41.89                               | 41.64                              | 34.5                        | 0.82                                    | 0.83                                   |

<sup>a</sup> Experimental chemical shifts are taken from Ref. 10.a. (**3B**, **4B**, **11** and **12**), Ref. 16 (**13**, **14**), Ref. 18. (**15**) and Ref 19. (**16**).

Optimized structures of carbocations **1** - **16** in Gaussian z-matrix format

Isopropyl cation 1

E (B3LYP/6-31G(d)) = -118.2117339 Hartree

E (B3LYP/6-31G(d)) + ZPE = -118.1124134 Hartree

NImag = 0

Final B3LYP/6-31G(d) structure in terms of initial Z-matrix:

C

C,1,r2

H,2,r3,1,a3

H,2,r4,1,a4,3,d4,0

H,2,r5,1,a5,3,d5,0

H,1,r6,2,a6,3,d6,0

H,1,r7,2,a7,3,d7,0

C,7,r8,1,a8,2,d8,0

H,8,r9,7,a9,1,d9,0

H,8,r10,7,a10,1,d10,0

Variables:

r2=1.44294135

r3=1.10912749

a3=108.10220158

r4=1.10928782

a4=108.0339845

d4=-108.58850267

r5=1.08982167

a5=115.4867559

d5=125.76261484

r6=1.09446821

a6=116.68676347

d6=54.16230466

r7=2.15014703

a7=99.39832871

d7=-125.83298226

r8=1.08982159

a8=37.28514096

d8=-179.8886148

r9=1.10929014

a9=111.53251847

d9=123.83159863

r10=1.10912546

a10=111.57724709

d10=-123.96503301

## Isopropyl cation 1

E (MP2/6-31G(d)) = - 117.7466525 Hartree  
E (MP2/6-31G(d)) + ZPE = -117.6559325 Hartree  
NImag = 0

Final MP2/6-31G(d) structure in terms of initial Z-matrix

C

C,1,R2  
H,1,R3,2,A3  
H,1,R4,2,A4,3,D4,0  
H,1,R5,2,A5,3,D5,0  
C,2,R6,1,A6,3,D6,0  
H,2,R7,1,A7,6,D7,0  
H,6,R8,2,A8,1,D8,0  
H,6,R9,2,A9,8,D9,0  
H,6,R10,2,A10,8,D10,0

Variables:

R2=1.43902238  
R3=1.08964777  
R4=1.11757304  
R5=1.09446505  
R6=1.43902218  
R7=1.09296681  
R8=1.11757402  
R9=1.09446824  
R10=1.08964839  
A3=114.92501639  
A4=101.02258304  
A5=113.21353219  
A6=125.45204578  
A7=117.27390587  
A8=101.02342289  
A9=113.21368966  
A10=114.92487802  
D4=-115.9448533  
D5=133.41475192  
D6=12.75375373  
D7=-179.99973971  
D8=-103.1877104  
D9=-110.64095387  
D10=115.94486488

*t*-butyl cation 2

E (B3LYP/6-31G(d)) = -157.5540581 Hartree  
E (B3LYP/6-31G(d)) + ZPE = -157.4375667 Hartree  
NImag = 0

Final B3LYP/6-31G(d) structure in terms of initial Z-matrix:

C  
C,1,r2  
C,2,r3,1,a3  
C,2,r4,1,a4,3,d4,0  
H,3,r5,2,a5,1,d5,0  
H,1,r6,2,a6,3,d6,0  
H,1,r7,2,a7,3,d7,0  
H,1,r8,2,a8,3,d8,0  
H,4,r9,2,a9,1,d9,0  
H,4,r10,2,a10,1,d10,0  
H,4,r11,2,a11,1,d11,0  
H,3,r12,2,a12,1,d12,0  
H,3,r13,2,a13,1,d13,0

Variables:

r2=1.4664639  
r3=1.46657356  
a3=120.66882316  
r4=1.46504218  
a4=119.66231962  
d4=-178.20280596  
r5=1.09242378  
a5=113.83478448  
d5=26.51385465  
r6=1.11048398  
a6=104.87257676  
d6=90.12569437  
r7=1.09238138  
a7=113.86578622  
d7=-26.24748922  
r8=1.09495932  
a8=112.87233546  
d8=-155.77308652  
r9=1.09383  
a9=113.61094461  
d9=23.5828535  
r10=1.11119302  
a10=104.07860446  
d10=-91.36719769  
r11=1.09405144  
a11=113.5463901  
d11=153.86997076  
r12=1.11044266  
a12=104.89017451  
d12=-89.81695885  
r13=1.09490937  
a13=112.89291521  
d13=156.01651576



*t*-butyl cation 2

E (MP2/6-31G(d)) = -156.9407116 Hartree

E (MP2/6-31G(d)) + ZPE = -156.8296776 Hartree

NImag = 0

Final MP2/6-31G(d) structure in terms of initial Z-matrix:

C  
C,1,R2  
H,1,R3,2,A3  
H,1,R4,2,A4,3,D4,0  
H,1,R5,2,A5,3,D5,0  
C,2,R6,1,A6,3,D6,0  
C,2,R7,1,A7,6,D7,0  
H,6,R8,2,A8,1,D8,0  
H,7,R9,2,A9,1,D9,0  
H,7,R10,2,A10,9,D10,0  
H,7,R11,2,A11,9,D11,0  
H,6,R12,2,A12,8,D12,0  
H,6,R13,2,A13,8,D13,0

Variables:

R2=1.46155664  
R3=1.10849922  
R4=1.09027439  
R5=1.09281934  
R6=1.46160928  
R7=1.45991271  
R8=1.09033582  
R9=1.09180092  
R10=1.10931672  
R11=1.09193385  
R12=1.1084909  
R13=1.09274307  
A3=104.060751  
A4=113.65184889  
A5=112.66645538  
A6=120.71614414  
A7=119.62418249  
A8=113.61798612  
A9=113.4292664  
A10=103.22079952  
A11=113.37838597  
A12=104.06421966  
A13=112.69962709  
D4=-116.40646071  
D5=114.25977879  
D6=89.83911592  
D7=-177.49719126  
D8=26.91914275  
D9=23.44500149  
D10=-114.97981329  
D11=130.16168877  
D12=-116.33253247  
D13=129.33475441

2-methyl-2-butyl cation **3A**

E (B3LYP/6-31G(d)) = -196.9715415 Hartree  
E (B3LYP/6-31G(d)) + ZPE = -196.8356466 Hartree  
NImag = 0

Final B3LYP/6-31G(d) structure in terms of initial Z-matrix:

H  
C,1,r2  
H,2,r3,1,a3  
C,2,r4,1,a4,3,d4,0  
H,2,r5,1,a5,3,d5,0  
C,4,r6,2,a6,1,d6,0  
H,6,r7,4,a7,2,d7,0  
C,4,r8,2,a8,1,d8,0  
H,8,r9,4,a9,2,d9,0  
H,8,r10,4,a10,2,d10,0  
H,8,r11,4,a11,2,d11,0  
H,6,r12,4,a12,2,d12,0  
H,6,r13,4,a13,2,d13,0  
C,7,r14,6,a14,4,d14,0  
H,14,r15,7,a15,6,d15,0  
H,14,r16,7,a16,6,d16,0

Variables:

r2=1.09106683  
r3=1.10227409  
a3=110.45177888  
r4=1.46956804  
a4=114.41916733  
d4=-123.54943619  
r5=1.10348095  
a5=110.04053266  
d5=114.0980686  
r6=1.46928189  
a6=119.40804202  
d6=-1.11641996  
r7=2.18596854  
a7=104.31096823  
d7=156.65195973  
r8=1.46544107  
a8=119.45616147  
d8=178.8335037  
r9=1.10325843  
a9=108.82097882  
d9=-124.01028828  
r10=1.10308464  
a10=108.86788164  
d10=124.10123504  
r11=1.09039979  
a11=114.39723457  
d11=-0.03170164  
r12=1.10946479  
a12=104.68592939  
d12=54.86798815  
r13=1.10794178  
a13=105.4996914  
d13=-50.92097839  
r14=1.09460847  
a14=40.34202653  
d14=128.64806001  
r15=1.09260556  
a15=107.47762061  
d15=119.95027319  
r16=1.09472135  
a16=108.59747517  
d16=-124.04979584

2-methyl-2-butyl cation **3A**

E (MP2/6-31G(d)) = - 196.1098651 Hartree

E (MP2/6-31G(d)) + ZPE = -195.9606691 Hartree

NImag = 0

Final MP2/6-31G(d) structure in terms of initial Z-matrix:

H  
C,1,R2  
H,2,R3,1,A3  
C,2,R4,1,A4,3,D4,0  
H,2,R5,1,A5,3,D5,0  
C,4,R6,2,A6,1,D6,0  
C,4,R7,2,A7,6,D7,0  
H,7,R8,4,A8,2,D8,0  
H,7,R9,4,A9,8,D9,0  
H,7,R10,4,A10,8,D10,0  
H,6,R11,4,A11,2,D11,0  
C,6,R12,4,A12,11,D12,0  
H,6,R13,4,A13,11,D13,0  
H,12,R14,6,A14,4,D14,0  
H,12,R15,6,A15,14,D15,0  
H,12,R16,6,A16,14,D16,0

Variables:

R2=1.10616408  
R3=1.09003462  
R4=1.4632242  
R5=1.09562808  
R6=1.46184374  
R7=1.46191304  
R8=1.10364367  
R9=1.09776873  
R10=1.08911555  
R11=1.10112624  
R12=1.52193223  
R13=1.11305112  
R14=1.09111716  
R15=1.09262188  
R16=1.09178304  
A3=108.71992707  
A4=105.01206309  
A5=105.05518642  
A6=119.38340222  
A7=119.55399195  
A8=107.1786151  
A9=109.95904604  
A10=113.80560142  
A11=108.0691348  
A12=119.29896235  
A13=101.41738614  
A14=109.07306553  
A15=111.28173024  
A16=112.11192808  
D4=-122.4419762  
D5=120.03261345  
D6=108.45801184  
D7=179.0767932  
D8=-117.10226835  
D9=-112.86929295  
D10=121.3218087  
D11=-37.60963284  
D12=-130.92200592  
D13=106.6763967  
D14=-177.5752103  
D15=-118.58342926  
D16=119.09579916

2-methyl-2-butyl cation **3B**

E (B3LYP/6-31G(d)) = -196.8716621 Hartree

E (B3LYP/6-31G(d)) + ZPE = -196.7256411 Hartree

NImag = 0

Final B3LYP/6-31G(d) structure in terms of initial Z-matrix:

H  
C,1,r2  
H,2,r3,1,a3  
C,2,r4,1,a4,3,d4,0  
H,2,r5,1,a5,3,d5,0  
C,4,r6,2,a6,1,d6,0  
H,6,r7,4,a7,2,d7,0  
C,4,r8,2,a8,1,d8,0  
H,8,r9,4,a9,2,d9,0  
H,8,r10,4,a10,2,d10,0  
H,8,r11,4,a11,2,d11,0  
H,6,r12,4,a12,2,d12,0  
H,6,r13,4,a13,2,d13,0  
C,7,r14,6,a14,4,d14,0  
H,14,r15,7,a15,6,d15,0  
H,14,r16,7,a16,6,d16,0

Variables:

r2=1.09102762  
r3=1.10670766  
a3=108.45706223  
r4=1.46970483  
a4=114.05142735  
d4=-118.48148687  
r5=1.09815878  
a5=111.45222359  
d5=114.35227168  
r6=1.45948686  
a6=120.42456331  
d6=5.39335749  
r7=2.23327161  
a7=91.51115421  
d7=-107.910863  
r8=1.47056496  
a8=119.73356092  
d8=-174.34624751  
r9=1.10812124  
a9=105.38037044  
d9=-98.6808081  
r10=1.09620786  
a10=112.10765983  
d10=147.88543757  
r11=1.09176479  
a11=114.29448507  
d11=19.44323555  
r12=1.09335536  
a12=112.43195326  
d12=157.66524802  
r13=1.09462461  
a13=111.67809404  
d13=32.16190355  
r14=1.09216292  
a14=41.33238374  
d14=122.13178879  
r15=1.09301476  
a15=108.83457068  
d15=116.47586005  
r16=1.09197702  
a16=109.7769619  
d16=-124.42248799

2-methyl-2-butyl cation **3B**

E (MP2/6-31G(d)) = -196.111144 Hartree

E (MP2/6-31G(d)) + ZPE = -195.9610270 Hartree

NImag = 0

Final MP2/6-31G(d) structure in terms of initial Z-matrix:

H  
C,1,R2  
H,2,R3,1,A3  
C,2,R4,1,A4,3,D4,0  
H,2,R5,1,A5,3,D5,0  
C,4,R6,2,A6,1,D6,0  
C,4,R7,2,A7,6,D7,0  
H,7,R8,4,A8,2,D8,0  
H,7,R9,4,A9,8,D9,0  
H,7,R10,4,A10,8,D10,0  
H,6,R11,4,A11,2,D11,0  
H,6,R12,4,A12,11,D12,0  
C,6,R13,4,A13,11,D13,0  
H,13,R14,6,A14,4,D14,0  
H,13,R15,6,A15,14,D15,0  
H,13,R16,6,A16,14,D16,0

Variables:

R2=1.08942581  
R3=1.10421373  
R4=1.46648643  
R5=1.09586188  
R6=1.44716721  
R7=1.46628291  
R8=1.10673074  
R9=1.09266046  
R10=1.09073766  
R11=1.09165209  
R12=1.09214371  
R13=1.58312177  
R14=1.0908042  
R15=1.09167808  
R16=1.09044616  
A3=108.79511828  
A4=113.6947164  
A5=111.54289833  
A6=120.49987174  
A7=119.60668905  
A8=104.16161209  
A9=112.54215376  
A10=113.8140985  
A11=113.14135434  
A12=112.77159524  
A13=101.70534517  
A14=111.84390447  
A15=105.49266778  
A16=111.697695  
D4=-117.86701278  
D5=115.4749353  
D6=4.50710885  
D7=-179.59166282  
D8=-92.04586074  
D9=-114.32425447  
D10=116.85572041  
D11=157.89775628  
D12=-127.95246134  
D13=116.46419624  
D14=-60.37712819  
D15=-118.04298712  
D16=123.80786715

2-methyl-2-pentyl cation **4A**

E (B3LYP/6-31G(d)) = -236.1867547 Hartree

E (B3LYP/6-31G(d)) + ZPE = -236.0121927 Hartree

NImag = 0

Final B3LYP/6-31G(d) structure in terms of initial Z-matrix:

H  
C,1,R2  
H,2,R3,1,A3  
H,2,R4,1,A4,3,D4,0  
C,2,R5,1,A5,3,D5,0  
C,5,R6,2,A6,1,D6,0  
C,5,R7,2,A7,6,D7,0  
C,6,R8,5,A8,2,D8,0  
H,7,R9,5,A9,2,D9,0  
H,7,R10,5,A10,9,D10,0  
H,6,R11,5,A11,8,D11,0  
H,6,R12,5,A12,8,D12,0  
H,7,R13,5,A13,9,D13,0  
C,8,R14,6,A14,5,D14,0  
H,8,R15,6,A15,14,D15,0  
H,8,R16,6,A16,14,D16,0  
H,14,R17,8,A17,6,D17,0  
H,14,R18,8,A18,17,D18,0  
H,14,R19,8,A19,17,D19,0

Variables:

R2=1.10197686  
R3=1.10425948  
R4=1.09010321  
R5=1.46651083  
R6=1.46788181  
R7=1.46967207  
R8=1.53341743  
R9=1.10674071  
R10=1.09172661  
R11=1.1151946  
R12=1.10399094  
R13=1.09917515  
R14=1.53305316  
R15=1.09773084  
R16=1.09691431  
R17=1.09303431  
R18=1.0954935  
R19=1.09549669  
A3=103.50327894  
A4=110.819399  
A5=109.30505566  
A6=121.18178646  
A7=119.35704749  
A8=120.36792457  
A9=106.37821403  
A10=114.29488282  
A11=102.16246795  
A12=108.06719833  
A13=110.95512895  
A14=111.50196709  
A15=109.08072207  
A16=109.90479037  
A17=110.17358127  
A18=111.4316537  
A19=111.4555591

D4=117.728941  
D5=-115.52226429  
D6=54.35162628  
D7=179.66865892  
D8=-11.43494437  
D9=68.42648095  
D10=120.01971147  
D11=122.79631037  
D12=-131.07250916  
D13=-112.82862966  
D14=178.42912695  
D15=121.34575118  
D16=-121.7892254  
D17=178.95082237  
D18=-119.53834314  
D19=119.54374629

2-methyl-2-pentyl cation **4A**

E (MP2/6-31G(d)) = - 235.2771648 Hartree

E (MP2/6-31G(d)) + ZPE = -235.0986888 Hartree

NImag = 0

Final MP2/6-31G(d) structure in terms of initial Z-matrix:

H  
C,1,R2  
H,2,R3,1,A3  
H,2,R4,1,A4,3,D4,0  
C,2,R5,1,A5,3,D5,0  
C,5,R6,2,A6,1,D6,0  
C,5,R7,2,A7,6,D7,0  
C,6,R8,5,A8,2,D8,0  
H,7,R9,5,A9,2,D9,0  
H,7,R10,5,A10,9,D10,0  
H,6,R11,5,A11,8,D11,0  
H,6,R12,5,A12,8,D12,0  
H,7,R13,5,A13,9,D13,0  
C,8,R14,6,A14,5,D14,0  
H,8,R15,6,A15,14,D15,0  
H,8,R16,6,A16,14,D16,0  
H,14,R17,8,A17,6,D17,0  
H,14,R18,8,A18,17,D18,0  
H,14,R19,8,A19,17,D19,0

Variables:

R2=1.10154781  
R3=1.1037945  
R4=1.09047307  
R5=1.46725978  
R6=1.46739053  
R7=1.46932967  
R8=1.53306689  
R9=1.10686651  
R10=1.09145674  
R11=1.11505775  
R12=1.10406127  
R13=1.09871448  
R14=1.53317586  
R15=1.09774807  
R16=1.09655231  
R17=1.09315363  
R18=1.09562073  
R19=1.09563622  
A3=103.52815574  
A4=110.86603635  
A5=109.31439066  
A6=121.15707811  
A7=119.33640046  
A8=120.38715738  
A9=106.39930367  
A10=114.30918159  
A11=102.20742527  
A12=108.01692424  
A13=110.98801695  
A14=111.49271856  
A15=109.07785403  
A16=109.93343674  
A17=110.17498224  
A18=111.45046749  
A19=111.47172385  
D4=117.73958344  
D5=-115.52034802  
D6=54.37622482  
D7=179.62212404  
D8=-11.45633695  
D9=68.46621703  
D10=119.9733647



D11=122.83636409  
D12=-131.06984516  
D13=-112.8412514  
D14=178.45744563  
D15=121.2864211  
D16=-121.82542576  
D17=178.93467613  
D18=-119.49073149  
D19=119.55918296

2-methyl-2-pentyl cation **4B**

E (B3LYP/6-31G(d)) = -236.1890571 Hartree

E (B3LYP/6-31G(d)) + ZPE = -236.0132941 Hartree

NImag = 0

Final B3LYP/6-31G(d) structure in terms of initial Z-matrix:

H  
C,1,R2  
H,2,R3,1,A3  
H,2,R4,1,A4,3,D4,0  
C,2,R5,1,A5,3,D5,0  
C,5,R6,2,A6,1,D6,0  
C,5,R7,2,A7,6,D7,0  
C,6,R8,5,A8,2,D8,0  
H,7,R9,5,A9,2,D9,0  
H,7,R10,5,A10,9,D10,0  
H,6,R11,5,A11,8,D11,0  
H,6,R12,5,A12,8,D12,0  
H,7,R13,5,A13,9,D13,0  
C,8,R14,6,A14,5,D14,0  
H,8,R15,6,A15,14,D15,0  
H,8,R16,6,A16,14,D16,0  
H,14,R17,8,A17,6,D17,0  
H,14,R18,8,A18,17,D18,0  
H,14,R19,8,A19,17,D19,0

Variables:

R2=1.09513936  
R3=1.092547  
R4=1.10789484  
R5=1.47247055  
R6=1.45163446  
R7=1.47218949  
R8=1.60628617  
R9=1.10245052  
R10=1.09053827  
R11=1.0938974  
R12=1.09338377  
R13=1.10190238  
R14=1.53163861  
R15=1.09442368  
R16=1.09404831  
R17=1.09532895  
R18=1.09403361  
R19=1.09405635  
A3=111.74143511  
A4=105.3195321  
A5=112.47292876  
A6=119.97921173  
A7=119.15828865  
A8=105.32149466  
A9=108.6703383  
A10=114.13266627  
A11=112.3775204  
A12=112.77068365  
A13=109.33969267  
A14=109.06505124  
A15=109.15482232  
A16=108.99139518  
A17=108.48024782  
A18=111.6921732  
A19=111.61395049  
D4=116.1346844  
D5=-129.75972166  
D6=-28.65403043  
D7=178.28371855  
D8=94.85752609

D9=53.54931902  
D10=123.00649253  
D11=116.04927004  
D12=-117.10061428  
D13=-112.93304485  
D14=-178.43515845  
D15=121.04247892  
D16=-121.10292969  
D17=-179.85447633  
D18=-118.98891465  
D19=119.02417326

2-methyl-2-butyl cation **4B**

E (MP2/6-31G(d)) = -235.2806244 Hartree

E (MP2/6-31G(d)) + ZPE = -235.1008714 Hartree

NImag = 0

Final MP2/6-31G(d) structure in terms of initial Z-matrix:

H  
C,1,R2  
H,2,R3,1,A3  
H,2,R4,1,A4,3,D4,0  
C,2,R5,1,A5,3,D5,0  
C,5,R6,2,A6,1,D6,0  
C,5,R7,2,A7,6,D7,0  
C,6,R8,5,A8,2,D8,0  
H,7,R9,5,A9,2,D9,0  
H,7,R10,5,A10,9,D10,0  
H,6,R11,5,A11,8,D11,0  
H,6,R12,5,A12,8,D12,0  
H,7,R13,5,A13,9,D13,0  
C,8,R14,6,A14,5,D14,0  
H,8,R15,6,A15,14,D15,0  
H,8,R16,6,A16,14,D16,0  
H,14,R17,8,A17,6,D17,0  
H,14,R18,8,A18,17,D18,0  
H,14,R19,8,A19,17,D19,0

Variables:

R2=1.09204578  
R3=1.09147887  
R4=1.10605535  
R5=1.46868665  
R6=1.43778733  
R7=1.46951282  
R8=1.6012708  
R9=1.10048116  
R10=1.08915642  
R11=1.09176758  
R12=1.09161233  
R13=1.09885714  
R14=1.52894701  
R15=1.09388002  
R16=1.09275617  
R17=1.09307241  
R18=1.09180603  
R19=1.09188121  
A3=111.91118226  
A4=106.39630818  
A5=112.73557822  
A6=120.11871226  
A7=119.01953895  
A8=100.48355297  
A9=107.9668236  
A10=113.66020539  
A11=113.83027254  
A12=113.8443699  
A13=109.41760166  
A14=108.06489725  
A15=110.25237448  
A16=109.09314265  
A17=108.64937756  
A18=111.35201558  
A19=111.21219283  
D4=116.87325626  
D5=-129.46704691  
D6=-23.35374223  
D7=177.98892511  
D8=94.46198399

D9=54.59305762  
D10=122.21154167  
D11=114.33289172  
D12=-115.37116374  
D13=-113.59199987  
D14=-174.39085681  
D15=120.61725371  
D16=-120.50127993  
D17=-178.7246577  
D18=-119.14161727  
D19=119.15045503

methyl\_cyclopentyl cation 5

E (B3LYP/6-31G(d)) = -234.9794440 Hartree

E (B3LYP/6-31G(d)) + ZPE = -234.8248711 Hartree

NImag = 0

Final B3LYP/6-31G(d) structure in terms of initial Z-matrix:

C  
C,1,r2  
C,2,r3,1,a3  
C,3,r4,2,a4,1,d4,0  
C,4,r5,3,a5,2,d5,0  
C,2,r6,1,a6,3,d6,0  
H,1,r7,2,a7,3,d7,0  
H,3,r8,2,a8,1,d8,0  
H,3,r9,2,a9,1,d9,0  
H,4,r10,3,a10,2,d10,0  
H,4,r11,3,a11,2,d11,0  
H,5,r12,4,a12,3,d12,0  
H,5,r13,4,a13,3,d13,0  
H,6,r14,2,a14,1,d14,0  
H,6,r15,2,a15,1,d15,0  
H,1,r16,2,a16,3,d16,0  
H,1,r17,2,a17,3,d17,0

Variables:

r2=1.46424483  
r3=1.47021441  
a3=125.35325295  
r4=1.54616737  
a4=106.23147672  
d4=-172.40767056  
r5=1.54247386  
a5=103.09211156  
d5=-27.35760672  
r6=1.46777586  
a6=124.77454186  
d6=177.90697661  
r7=1.09539014  
a7=112.39961724  
d7=152.59614296  
r8=1.11399525  
a8=102.57922761  
d8=72.2752284  
r9=1.09684395  
a9=113.99787027  
d9=-39.99666028  
r10=1.09565086  
a10=109.46786857  
d10=90.83548555  
r11=1.09131918  
a11=112.22121324  
d11=-149.63071567  
r12=1.09568581  
a12=111.09998865  
d12=-83.05616393  
r13=1.09135334  
a13=113.36303394  
d13=155.40558748  
r14=1.09659596  
a14=114.75432396  
d14=-31.99344606  
r15=1.1155756  
a15=101.41598248  
d15=80.21812592  
r16=1.09268501  
a16=113.58136296  
d16=24.32382323  
r17=1.10789312

a17=105.79518585  
d17=-92.96718763

1-methyl-cyclopentyl cation 5

E (MP2/6-31G(d)) = -234.1085876Hartree

E (MP2/6-31G(d)) + ZPE = -233.9508256 Hartree

NImag = 0

Final MP2/6-31G(d) structure in terms of initial Z-matrix:

C  
C,1,R2  
C,1,R3,2,A3  
H,1,R4,2,A4,3,D4,0  
H,1,R5,2,A5,3,D5,0  
C,3,R6,1,A6,2,D6,0  
C,2,R7,1,A7,3,D7,0  
H,2,R8,1,A8,7,D8,0  
H,2,R9,1,A9,7,D9,0  
H,3,R10,1,A10,6,D10,0  
H,3,R11,1,A11,6,D11,0  
C,7,R12,2,A12,1,D12,0  
H,6,R13,3,A13,1,D13,0  
H,6,R14,3,A14,13,D14,0  
H,12,R15,7,A15,2,D15,0  
H,12,R16,7,A16,15,D16,0  
H,12,R17,7,A17,15,D17,0

Variables:

R2=1.53787868  
R3=1.53440897  
R4=1.09483076  
R5=1.09115175  
R6=1.5370533  
R7=1.4630789  
R8=1.11400762  
R9=1.09557565  
R10=1.09491913  
R11=1.09117053  
R12=1.46014833  
R13=1.11580342  
R14=1.09567721  
R15=1.09318756  
R16=1.09095474  
R17=1.10615316  
A3=102.64998728  
A4=109.66211395  
A5=112.28331317  
A6=102.44062587  
A7=105.80316006  
A8=109.40499762  
A9=118.99169241  
A10=111.00169804  
A11=113.46432916  
A12=125.37953893  
A13=109.01470855  
A14=119.49332492  
A15=112.20757778  
A16=113.30104152  
A17=104.94099027  
D4=-117.92907442  
D5=122.17282248  
D6=-36.26090001  
D7=29.47436154  
D8=-108.81211555  
D9=130.29138327  
D10=117.00234621  
D11=-121.28757643  
D12=171.68446695  
D13=-76.59765082  
D14=-121.1140095  
D15=-153.95792215



D16=128.21897754  
D17=-114.66966165

1-methyl-cyclohexyl cation **6A**

E (B3LYP/6-31G(d)) = -274.300061 Hartree

E (B3LYP/6-31G(d)) + ZPE = -274.1137065 Hartree

NImag = 0

Final B3LYP/6-31G(d) structure in terms of initial Z-matrix:

H  
C,1,r2  
C,2,r3,1,a3  
C,3,r4,2,a4,1,d4,0  
C,3,r5,2,a5,1,d5,0  
C,4,r6,3,a6,2,d6,0  
C,3,r7,2,a7,1,d7,0  
H,3,r8,2,a8,1,d8,0  
H,4,r9,3,a9,2,d9,0  
H,5,r10,3,a10,2,d10,0  
H,6,r11,4,a11,3,d11,0  
H,7,r12,3,a12,2,d12,0  
H,2,r13,1,a13,3,d13,0  
H,3,r14,2,a14,1,d14,0  
H,4,r15,3,a15,2,d15,0  
H,5,r16,3,a16,2,d16,0  
C,11,r17,6,a17,4,d17,0  
H,7,r18,3,a18,2,d18,0  
H,17,r19,11,a19,6,d19,0  
H,17,r20,11,a20,6,d20,0

Variables:

r2=1.09669877  
r3=2.54983561  
a3=147.42357319  
r4=2.54984165  
a4=59.92890859  
d4=135.40990551  
r5=1.53216661  
a5=89.83996697  
d5=117.82833839  
r6=1.46984512  
a6=89.66937434  
d6=-4.56764268  
r7=1.53216696  
a7=34.27184722  
d7=-12.14823188  
r8=1.09855456  
a8=94.43336109  
d8=-132.02735947  
r9=1.1140603  
a9=95.71409673  
d9=96.82000343  
r10=1.09669851  
a10=110.27705266  
d10=-92.82857861  
r11=2.04856539  
a11=115.63811292  
d11=-138.45385344  
r12=1.09669853  
a12=110.27692191  
d12=120.48794562  
r13=1.11406079  
a13=104.13870186  
d13=-125.79450645  
r14=1.09464297  
a14=143.69890194  
d14=-6.29296722  
r15=1.09669971  
a15=147.42273334  
d15=-135.40795704  
r16=1.09342186

a16=111.32996713  
d16=148.94931642  
r17=1.1097952  
a17=43.92300133  
d17=-106.03926321  
r18=1.09342165  
a18=111.33002517  
d18=-121.29021544  
r19=1.09402717  
a19=106.20402016  
d19=120.18018714  
r20=1.09402743  
a20=106.2039571  
d20=-120.17989026

1-methyl-cyclohexyl cation **6A**

E (MP2/6-31G(d)) = -273.2812865 Hartree

E (MP2/6-31G(d)) + ZPE = -273.0929835 Hartree

NImag = 0

Final MP2/6-31G(d) structure in terms of initial Z-matrix:

H  
C,1,R2  
C,2,R3,1,A3  
C,2,R4,1,A4,3,D4,0  
H,2,R5,1,A5,3,D5,0  
C,4,R6,2,A6,1,D6,0  
C,3,R7,2,A7,1,D7,0  
H,4,R8,2,A8,6,D8,0  
C,3,R9,7,A9,2,D9,0  
H,4,R10,2,A10,6,D10,0  
C,6,R11,4,A11,2,D11,0  
H,6,R12,4,A12,11,D12,0  
H,7,R13,3,A13,2,D13,0  
H,9,R14,3,A14,2,D14,0  
H,6,R15,4,A15,11,D15,0  
H,7,R16,3,A16,13,D16,0  
H,9,R17,3,A17,14,D17,0  
H,9,R18,3,A18,14,D18,0  
H,11,R19,6,A19,4,D19,0  
H,11,R20,6,A20,19,D20,0

Variables:

R2=1.09637563  
R3=1.46290586  
R4=1.53547104  
R5=1.11431828  
R6=1.52529528  
R7=1.46290573  
R8=1.09556058  
R9=1.46264623  
R10=1.09329897  
R11=1.52529592  
R12=1.09762396  
R13=1.11431799  
R14=1.10817158  
R15=1.09396139  
R16=1.09637465  
R17=1.09218393  
R18=1.09218297  
R19=1.09555978  
R20=1.09329835  
A3=110.86941342  
A4=114.2130349  
A5=104.37656328  
A6=111.40370129  
A7=120.32135662  
A8=108.62311237  
A9=119.81166264  
A10=108.41835985  
A11=110.55846372  
A12=110.14715404  
A13=100.50579577  
A14=103.40415885  
A15=109.6540088  
A16=110.86967195  
A17=113.27299725  
A18=113.27347412  
A19=110.11205004  
A20=111.36975547  
D4=-133.38646314

D5=107.4074042  
D6=173.33274445  
D7=-161.44688255  
D8=-121.45444421  
D9=177.29641035  
D10=122.89067232  
D11=-56.84555647  
D12=121.96737442  
D13=-88.61627974  
D14=-91.34748443  
D15=-121.02350499  
D16=-109.93560503  
D17=-115.2010461  
D18=115.20191739  
D19=-63.73759613  
D20=-118.23209997

1-methyl-cyclohexyl cation **6B**

E (B3LYP/6-31G(d)) = -274.3023439 Hartree

E (B3LYP/6-31G(d)) + ZPE = -274.1162919 Hartree

NImag = 0

Final B3LYP/6-31G(d) structure in terms of initial Z-matrix:

C  
C,1,R2  
H,1,R3,2,A3  
H,1,R4,2,A4,3,D4,0  
H,1,R5,2,A5,3,D5,0  
C,2,R6,1,A6,3,D6,0  
C,2,R7,1,A7,6,D7,0  
C,7,R8,2,A8,1,D8,0  
C,6,R9,2,A9,1,D9,0  
H,6,R10,2,A10,9,D10,0  
H,6,R11,2,A11,9,D11,0  
H,7,R12,2,A12,8,D12,0  
H,7,R13,2,A13,8,D13,0  
C,8,R14,7,A14,2,D14,0  
H,8,R15,7,A15,14,D15,0  
H,8,R16,7,A16,14,D16,0  
H,9,R17,6,A17,2,D17,0  
H,9,R18,6,A18,17,D18,0  
H,14,R19,8,A19,7,D19,0  
H,14,R20,8,A20,19,D20,0

Variables:

R2=1.46989934  
R3=1.09392035  
R4=1.10873312  
R5=1.09394143  
R6=1.45905969  
R7=1.45922689  
R8=1.60476721  
R9=1.60507068  
R10=1.09202212  
R11=1.09443341  
R12=1.09204051  
R13=1.09446786  
R14=1.5276624  
R15=1.09551474  
R16=1.09397762  
R17=1.09399303  
R18=1.0955161  
R19=1.09732623  
R20=1.09685928  
A3=113.42287754  
A4=104.76017373  
A5=113.4148822  
A6=121.00861985  
A7=121.00640212  
A8=103.29296681  
A9=103.23959645  
A10=113.63198539  
A11=112.20255649  
A12=113.61734207  
A13=112.1717583  
A14=110.53699694  
A15=109.03445132  
A16=105.48700726  
A17=105.46426991  
A18=109.04152606  
A19=109.03271402  
A20=110.17263913  
D4=-115.33254354  
D5=129.35507018  
D6=20.72609553

D7=-170.97364463  
D8=102.85511349  
D9=-102.82330595  
D10=118.60310855  
D11=-114.61967161  
D12=-118.6354006  
D13=114.64735426  
D14=56.34496482  
D15=-122.6716762  
D16=122.15508193  
D17=-178.59709594  
D18=-115.16127251  
D19=-175.6707955  
D20=-116.79043517

1-methyl-cyclohexyl cation **6B**

E (MP2/6-31G(d)) = -273.2861339 Hartree

E (MP2/6-31G(d)) + ZPE = -273.0978309 Hartree

NImag = 0

Final MP2/6-31G(d) structure in terms of initial Z-matrix:

C  
C,1,R2  
H,1,R3,2,A3  
H,1,R4,2,A4,3,D4,0  
H,1,R5,2,A5,3,D5,0  
C,2,R6,1,A6,3,D6,0  
C,2,R7,1,A7,6,D7,0  
C,7,R8,2,A8,1,D8,0  
C,6,R9,2,A9,1,D9,0  
H,6,R10,2,A10,9,D10,0  
H,6,R11,2,A11,9,D11,0  
H,7,R12,2,A12,8,D12,0  
H,7,R13,2,A13,8,D13,0  
C,8,R14,7,A14,2,D14,0  
H,8,R15,7,A15,14,D15,0  
H,8,R16,7,A16,14,D16,0  
H,9,R17,6,A17,2,D17,0  
H,9,R18,6,A18,17,D18,0  
H,14,R19,8,A19,7,D19,0  
H,14,R20,8,A20,19,D20,0

Variables:

R2=1.46729403  
R3=1.09227879  
R4=1.10645214  
R5=1.0922785  
R6=1.44880394  
R7=1.44883108  
R8=1.59904976  
R9=1.59909572  
R10=1.09170593  
R11=1.09248299  
R12=1.09170832  
R13=1.09248466  
R14=1.52010874  
R15=1.09514644  
R16=1.09389268  
R17=1.09389376  
R18=1.09514658  
R19=1.09629916  
R20=1.09577864  
A3=113.18923529  
A4=104.09936025  
A5=113.18903964  
A6=120.69038789  
A7=120.6892243  
A8=100.87371028  
A9=100.86676651  
A10=113.87991883  
A11=113.0687775  
A12=113.87671368  
A13=113.06591435  
A14=110.15192921  
A15=109.4182852  
A16=105.27586372  
A17=105.27167536  
A18=109.41880448  
A19=109.25230585  
A20=110.19880158  
D4=-115.54262666  
D5=128.91471876



D6=20.62167312  
D7=-170.16837266  
D8=98.20822751  
D9=-98.20896854  
D10=117.11508052  
D11=-114.24084662  
D12=-117.11937069  
D13=114.24502119  
D14=57.73461582  
D15=-122.6950668  
D16=121.95353745  
D17=-179.69261265  
D18=-115.34942509  
D19=-177.37108166  
D20=-117.14291406

1,4-dimethyl-cyclohexyl cation **7A**

E (B3LYP/6-31G(d)) = -313.6161671 Hartree

E (B3LYP/6-31G(d)) + ZPE = -313.4036861 Hartree

NImag = 0

Final B3LYP/6-31G(d) structure in terms of initial Z-matrix:

C  
C,1,R2  
C,1,R3,2,A3  
H,1,R4,2,A4,3,D4,0  
H,1,R5,2,A5,3,D5,0  
C,2,R6,1,A6,3,D6,0  
C,3,R7,1,A7,2,D7,0  
C,2,R8,1,A8,6,D8,0  
H,2,R9,1,A9,6,D9,0  
H,3,R10,1,A10,7,D10,0  
H,3,R11,1,A11,7,D11,0  
C,6,R12,2,A12,1,D12,0  
C,7,R13,3,A13,1,D13,0  
H,6,R14,2,A14,12,D14,0  
H,6,R15,2,A15,12,D15,0  
H,8,R16,2,A16,1,D16,0  
H,8,R17,2,A17,16,D17,0  
H,8,R18,2,A18,16,D18,0  
H,12,R19,6,A19,2,D19,0  
H,12,R20,6,A20,19,D20,0  
H,13,R21,7,A21,3,D21,0  
H,13,R22,7,A22,21,D22,0  
H,13,R23,7,A23,21,D23,0

Variables:

R2=1.53667009  
R3=1.54536884  
R4=1.09406117  
R5=1.0976313  
R6=1.53667027  
R7=1.4686718  
R8=1.53410444  
R9=1.1012589  
R10=1.11428843  
R11=1.09690731  
R12=1.545369  
R13=1.46766894  
R14=1.09763109  
R15=1.09406116  
R16=1.09647351  
R17=1.09467607  
R18=1.09467605  
R19=1.09690598  
R20=1.11428797  
R21=1.09398347  
R22=1.09398677  
R23=1.10964071  
A3=112.66352167  
A4=110.93624557  
A5=109.89442433  
A6=109.65163844  
A7=116.17160326  
A8=111.28108186  
A9=108.19905001  
A10=108.93773704  
A11=113.96803275  
A12=112.66323659  
A13=120.05334623  
A14=109.8945258  
A15=110.93627623  
A16=111.19723581  
A17=110.94034465  
A18=110.94033344

A19=113.96828023  
A20=108.93737353  
A21=113.45098765  
A22=113.44960165  
A23=104.40584705  
D4=-121.46518661  
D5=120.93999043  
D6=-54.94804998  
D7=42.42482537  
D8=-123.55142385  
D9=117.8073236  
D10=-113.47710486  
D11=130.88127538  
D12=54.94888666  
D13=152.56824442  
D14=-120.94003198  
D15=121.46501388  
D16=61.30941981  
D17=-120.12303004  
D18=120.12302799  
D19=-173.30777352  
D20=-115.64181207  
D21=24.15052724  
D22=129.59396624  
D23=-115.2041446

1,4-dimethyl-cyclohexyl cation **7A**

E (MP2/6-31G(d)) = -312.4515095 Hartree

E (MP2/6-31G(d)) + ZPE = -312.2346215 Hartree

NImag = 0

Final MP2/6-31G(d) structure in terms of initial Z-matrix:

C  
C,1,R2  
C,1,R3,2,A3  
H,1,R4,2,A4,3,D4,0  
H,1,R5,2,A5,3,D5,0  
C,2,R6,1,A6,3,D6,0  
C,3,R7,1,A7,2,D7,0  
C,2,R8,1,A8,6,D8,0  
H,2,R9,1,A9,6,D9,0  
H,3,R10,1,A10,7,D10,0  
H,3,R11,1,A11,7,D11,0  
C,6,R12,2,A12,1,D12,0  
C,7,R13,3,A13,1,D13,0  
H,6,R14,2,A14,12,D14,0  
H,6,R15,2,A15,12,D15,0  
H,8,R16,2,A16,1,D16,0  
H,8,R17,2,A17,16,D17,0  
H,8,R18,2,A18,16,D18,0  
H,12,R19,6,A19,2,D19,0  
H,12,R20,6,A20,19,D20,0  
H,13,R21,7,A21,3,D21,0  
H,13,R22,7,A22,21,D22,0  
H,13,R23,7,A23,21,D23,0

Variables:

R2=1.52763017  
R3=1.53432963  
R4=1.09424803  
R5=1.09683863  
R6=1.52763016  
R7=1.46198276  
R8=1.52635539  
R9=1.10077694  
R10=1.11453451  
R11=1.09673055  
R12=1.53432967  
R13=1.46285082  
R14=1.09683863  
R15=1.09424803  
R16=1.09465026  
R17=1.09326199  
R18=1.09326199  
R19=1.09673057  
R20=1.11453451  
R21=1.09217193  
R22=1.09217164  
R23=1.10804037  
A3=112.26582526  
A4=110.92687247  
A5=109.57884033  
A6=109.33667181  
A7=116.03154083  
A8=111.07221551  
A9=108.44062522  
A10=109.31763037  
A11=114.29809187  
A12=112.265852  
A13=119.89635472  
A14=109.57883209  
A15=110.92687047  
A16=110.6852291  
A17=110.88977438

A18=110.88977622  
A19=114.29807532  
A20=109.31766733  
A21=113.27378289  
A22=113.27388498  
A23=103.41475955  
D4=-121.47013917  
D5=121.00420662  
D6=-56.47819169  
D7=42.60190814  
D8=-122.92608939  
D9=118.05946589  
D10=-112.63185891  
D11=130.9871259  
D12=56.47812761  
D13=154.24873109  
D14=-121.00419609  
D15=121.4701597  
D16=60.96024519  
D17=-120.03460762  
D18=120.03460808  
D19=-173.58887502  
D20=-116.3810069  
D21=23.83839828  
D22=129.57623178  
D23=-115.21175526

1,4-dimethyl-cyclohexyl cation **7B**

E (B3LYP/6-31G(d)) = -313.6179664 Hartree

E (B3LYP/6-31G(d)) + ZPE = -313.4054869 Hartree

NImag = 0

Final B3LYP/6-31G(d) structure in terms of initial Z-matrix:

C  
C,1,R2  
H,1,R3,2,A3  
H,1,R4,2,A4,3,D4,0  
H,1,R5,2,A5,3,D5,0  
C,2,R6,1,A6,3,D6,0  
C,2,R7,1,A7,6,D7,0  
C,7,R8,2,A8,1,D8,0  
C,6,R9,2,A9,1,D9,0  
H,6,R10,2,A10,9,D10,0  
H,6,R11,2,A11,9,D11,0  
H,7,R12,2,A12,8,D12,0  
H,7,R13,2,A13,8,D13,0  
C,8,R14,7,A14,2,D14,0  
H,8,R15,7,A15,14,D15,0  
H,8,R16,7,A16,14,D16,0  
H,9,R17,6,A17,2,D17,0  
H,9,R18,6,A18,17,D18,0  
C,14,R19,8,A19,7,D19,0  
H,14,R20,8,A20,19,D20,0  
H,19,R21,14,A21,8,D21,0  
H,19,R22,14,A22,21,D22,0  
H,19,R23,14,A23,21,D23,0

Variables:

R2=1.46934013  
R3=1.0938934  
R4=1.10904433  
R5=1.09391068  
R6=1.45992681  
R7=1.45994025  
R8=1.60118558  
R9=1.60122499  
R10=1.09211944  
R11=1.09482858  
R12=1.09211945  
R13=1.09482117  
R14=1.53170057  
R15=1.09658486  
R16=1.09440618  
R17=1.09438986  
R18=1.09659497  
R19=1.5411223  
R20=1.0992893  
R21=1.09603803  
R22=1.09398516  
R23=1.09400731  
A3=113.46385912  
A4=104.68981891  
A5=113.4582899  
A6=121.05395689  
A7=121.04885452  
A8=103.44929511  
A9=103.46848671  
A10=113.51139009  
A11=112.0129177  
A12=113.51240759  
A13=112.01996327  
A14=111.42413876  
A15=109.18259926  
A16=105.38925927  
A17=105.38563207

A18=109.18118018  
A19=110.92678793  
A20=108.29517703  
A21=111.32139551  
A22=110.7114268  
A23=110.72733911  
D4=-115.26394411  
D5=129.48747344  
D6=20.84332651  
D7=-171.2230257  
D8=104.0406945  
D9=-104.05282406  
D10=118.99334484  
D11=-114.74273127  
D12=-118.98481298  
D13=114.74559919  
D14=56.77774431  
D15=-122.78447934  
D16=122.22160004  
D17=-178.9541  
D18=-114.99480756  
D19=-178.36192657  
D20=-118.57775034  
D21=60.80323169  
D22=-120.26192106  
D23=120.26254527

1,4-dimethyl-cyclohexyl cation **7B**

E (MP2/6-31G(d)) = -312.4559264 Hartree

E (MP2/6-31G(d)) + ZPE = -312.2365338 Hartree

NImag = 0

Final MP2/6-31G(d) structure in terms of initial Z-matrix:

C

C,1,R2  
H,1,R3,2,A3  
H,1,R4,2,A4,3,D4,0  
H,1,R5,2,A5,3,D5,0  
C,2,R6,1,A6,3,D6,0  
C,2,R7,1,A7,6,D7,0  
C,7,R8,2,A8,1,D8,0  
C,6,R9,2,A9,1,D9,0  
H,6,R10,2,A10,9,D10,0  
H,6,R11,2,A11,9,D11,0  
H,7,R12,2,A12,8,D12,0  
H,7,R13,2,A13,8,D13,0  
C,8,R14,7,A14,2,D14,0  
H,8,R15,7,A15,14,D15,0  
H,8,R16,7,A16,14,D16,0  
H,9,R17,6,A17,2,D17,0  
H,9,R18,6,A18,17,D18,0  
C,14,R19,8,A19,7,D19,0  
H,14,R20,8,A20,19,D20,0  
H,19,R21,14,A21,8,D21,0  
H,19,R22,14,A22,21,D22,0  
H,19,R23,14,A23,21,D23,0

Variables:

R2=1.46707977  
R3=1.0922474  
R4=1.10658983  
R5=1.09224862  
R6=1.44869473  
R7=1.44868393  
R8=1.59692584  
R9=1.59691302  
R10=1.09181273  
R11=1.09252902  
R12=1.09181071  
R13=1.09252322  
R14=1.52322458  
R15=1.09657419  
R16=1.09461903  
R17=1.09460699  
R18=1.09658306  
R19=1.53208957  
R20=1.09868425  
R21=1.0943368  
R22=1.0926656  
R23=1.09268023  
A3=113.18543417  
A4=104.04579313  
A5=113.18538443  
A6=120.71599197  
A7=120.71574385  
A8=100.6962872  
A9=100.71274898  
A10=113.85790689  
A11=113.06236411  
A12=113.8598396  
A13=113.06795584  
A14=111.11021015  
A15=109.60686225  
A16=105.30142189  
A17=105.30051561  
A18=109.6086837



A19=110.83227132  
A20=108.41488967  
A21=110.86747866  
A22=110.71411929  
A23=110.72551947  
D4=-115.52639982  
D5=128.9485128  
D6=20.63476541  
D7=-170.21554039  
D8=98.40995884  
D9=-98.41752677  
D10=117.14392214  
D11=-114.28298628  
D12=-117.13549173  
D13=114.28220725  
D14=58.03190306  
D15=-122.72210221  
D16=121.98599479  
D17=-179.98395943  
D18=-115.29478535  
D19=-179.09061974  
D20=-118.99668549  
D21=60.63038764  
D22=-120.20313398  
D23=120.20474473

1,3,3-trimethyl-cyclohexyl cation **8**

E (B3LYP/6-31G(d)) = -156.2964481 Hartree

E (B3LYP/6-31G(d)) + ZPE = -156.0560031 Hartree

NImag = 0

Final B3LYP/6-31G(d) structure in terms of initial Z-matrix:

C  
C,1,R2  
C,1,R3,2,A3  
H,1,R4,2,A4,3,D4,0  
H,1,R5,2,A5,3,D5,0  
C,2,R6,1,A6,3,D6,0  
C,3,R7,1,A7,2,D7,0  
H,2,R8,1,A8,6,D8,0  
H,2,R9,1,A9,6,D9,0  
H,3,R10,1,A10,7,D10,0  
H,3,R11,1,A11,7,D11,0  
C,6,R12,2,A12,1,D12,0  
C,7,R13,3,A13,1,D13,0  
C,6,R14,2,A14,12,D14,0  
C,6,R15,2,A15,12,D15,0  
H,12,R16,6,A16,2,D16,0  
H,12,R17,6,A17,16,D17,0  
H,13,R18,7,A18,3,D18,0  
H,13,R19,7,A19,18,D19,0  
H,13,R20,7,A20,18,D20,0  
H,14,R21,6,A21,2,D21,0  
H,14,R22,6,A22,21,D22,0  
H,14,R23,6,A23,21,D23,0  
H,15,R24,6,A24,2,D24,0  
H,15,R25,6,A25,24,D25,0  
H,15,R26,6,A26,24,D26,0

Variables:

R2=1.53825856  
R3=1.5340295  
R4=1.09343404  
R5=1.09712739  
R6=1.55299107  
R7=1.47307122  
R8=1.09437549  
R9=1.09820847  
R10=1.10213481  
R11=1.10896502  
R12=1.62339176  
R13=1.47054931  
R14=1.53663887  
R15=1.53809494  
R16=1.0916917  
R17=1.10318122  
R18=1.10651921  
R19=1.09746098  
R20=1.09199014  
R21=1.09562502  
R22=1.09526481  
R23=1.09679487  
R24=1.09609057  
R25=1.09534268  
R26=1.09516872  
A3=108.93712223  
A4=110.98341  
A5=110.73330196  
A6=113.33801537  
A7=113.74281883  
A8=109.94899805  
A9=108.15292575  
A10=113.05339749  
A11=112.30744704  
A12=109.77074482

A13=120.96630621  
A14=111.1916942  
A15=111.34178814  
A16=111.08681435  
A17=103.74248201  
A18=106.56000464  
A19=111.33444276  
A20=113.95418098  
A21=109.45136426  
A22=111.71426515  
A23=112.30253898  
A24=111.83348362  
A25=111.61679359  
A26=109.46844705  
D4=-120.28630547  
D5=121.78310166  
D6=-61.53666127  
D7=44.21111649  
D8=-122.51388356  
D9=121.67632957  
D10=-124.27644016  
D11=119.7191984  
D12=21.36209891  
D13=-164.26689779  
D14=119.36481815  
D15=-117.29676877  
D16=164.08574533  
D17=117.18923542  
D18=107.80424585  
D19=113.64606171  
D20=-119.45336243  
D21=59.76020644  
D22=118.93129125  
D23=-118.96857924  
D24=51.96531795  
D25=121.44475096  
D26=-119.43042614

1,3,3-trimethyl-cyclohexyl **8**

E (MP2/6-31G(d)) = -351.6220254 Hartree  
E (MP2/6-31G(d)) + ZPE = -351.3766324 Hartree  
NImag = 0

Final MP2/6-31G(d) structure in terms of initial Z-matrix:

C  
C,1,R2  
C,1,R3,2,A3  
H,1,R4,2,A4,3,D4,0  
H,1,R5,2,A5,3,D5,0  
C,2,R6,1,A6,3,D6,0  
C,3,R7,1,A7,2,D7,0  
C,2,R8,1,A8,6,D8,0  
C,2,R9,1,A9,6,D9,0  
H,3,R10,1,A10,7,D10,0  
H,3,R11,1,A11,7,D11,0  
C,6,R12,2,A12,1,D12,0  
C,7,R13,3,A13,1,D13,0  
H,6,R14,2,A14,12,D14,0  
H,6,R15,2,A15,12,D15,0  
H,8,R16,2,A16,1,D16,0  
H,8,R17,2,A17,16,D17,0  
H,8,R18,2,A18,16,D18,0  
H,9,R19,2,A19,1,D19,0  
H,9,R20,2,A20,19,D20,0  
H,9,R21,2,A21,19,D21,0  
H,12,R22,6,A22,2,D22,0  
H,12,R23,6,A23,22,D23,0  
H,13,R24,7,A24,3,D24,0  
H,13,R25,7,A25,24,D25,0  
H,13,R26,7,A26,24,D26,0

Variables:

R2=1.53312708  
R3=1.53548951  
R4=1.09684178  
R5=1.0951911  
R6=1.53312705  
R7=1.4601062  
R8=1.53053708  
R9=1.53190532  
R10=1.09676641  
R11=1.1141204  
R12=1.53548956  
R13=1.46357671  
R14=1.0951911  
R15=1.09684177  
R16=1.09428548  
R17=1.09428548  
R18=1.09477735  
R19=1.09671296  
R20=1.09431931  
R21=1.09431931  
R22=1.09676641  
R23=1.1141204  
R24=1.10774418  
R25=1.09220106  
R26=1.09220104  
A3=113.22515861  
A4=109.63119174  
A5=110.49639616  
A6=108.15795092  
A7=115.93963147  
A8=108.83179514

A9=111.00424554  
A10=113.9675554  
A11=109.69936355  
A12=113.22515879  
A13=120.05525766  
A14=110.49639519  
A15=109.63119251  
A16=110.61924627  
A17=110.61924752  
A18=111.20352391  
A19=113.69065283  
A20=110.35227946  
A21=110.35227442  
A22=113.96755574  
A23=109.69935943  
A24=103.55712267  
A25=113.22138721  
A26=113.22138667  
D4=-120.99342279  
D5=121.7993511  
D6=55.53503849  
D7=-43.16456866  
D8=118.08457025  
D9=-122.0051412  
D10=-130.66020282  
D11=113.01920472  
D12=-55.53503614  
D13=-153.2149053  
D14=-121.79934503  
D15=120.99342617  
D16=61.3982418  
D17=119.54513998  
D18=-120.22743026  
D19=60.16546022  
D20=120.56827763  
D21=-120.5682748  
D22=173.82476879  
D23=116.32059171  
D24=91.2981828  
D25=115.29654229  
D26=-115.29654141

cyclopentyl cation **9**

E (B3LYP/6-31G(d)) = -195.6368124 Hartree

E (B3LYP/6-31G(d)) + ZPE = -195.5107494 Hartree

NImag = 0

Final B3LYP/6-31G(d) structure in terms of initial Z-matrix:

H  
C,1,r2  
C,2,r3,1,a3  
C,3,r4,2,a4,1,d4,0  
C,4,r5,3,a5,2,d5,0  
C,2,r6,1,a6,3,d6,0  
H,2,r7,1,a7,3,d7,0  
H,6,r8,2,a8,1,d8,0  
H,3,r9,2,a9,1,d9,0  
H,4,r10,3,a10,2,d10,0  
H,4,r11,3,a11,2,d11,0  
H,5,r12,4,a12,3,d12,0  
H,5,r13,4,a13,3,d13,0  
H,6,r14,2,a14,1,d14,0

Variables:

r2=1.096899  
r3=1.44621723  
a3=115.93364158  
r4=1.446293  
a4=111.82283111  
d4=146.33832382  
r5=1.54858001  
a5=105.94119865  
d5=9.97031101  
r6=1.54852856  
a6=120.33390678  
d6=129.67045466  
r7=1.12469562  
a7=103.6778565  
d7=-107.28797922  
r8=1.09102588  
a8=112.19235732  
d8=78.00394036  
r9=1.09185269  
a9=124.08742741  
d9=-33.71525888  
r10=1.09690241  
a10=115.93524732  
d10=146.25678384  
r11=1.12461917  
a11=98.99279687  
d11=-103.66495027  
r12=1.0910289  
a12=112.19319791  
d12=-148.00463695  
r13=1.09559335  
a13=108.93395512  
d13=92.73839834  
r14=1.09559755  
a14=108.93437687  
d14=-41.2534722

cyclopentyl cation **9**

E (MP2/6-31G(d)) = -194.9141583 Hartree

E (MP2/6-31G(d)) + ZPE = -194.7854573 Hartree

NImag = 0

Final MP2/6-31G(d) structure in terms of initial Z-matrix:

C  
 C,1,R2  
 C,1,R3,2,A3  
 H,1,R4,2,A4,3,D4,0  
 H,1,R5,2,A5,3,D5,0  
 C,2,R6,1,A6,3,D6,0  
 C,3,R7,1,A7,2,D7,0  
 H,2,R8,1,A8,6,D8,0  
 H,2,R9,1,A9,6,D9,0  
 H,3,R10,1,A10,7,D10,0  
 H,3,R11,1,A11,7,D11,0  
 H,6,R12,2,A12,1,D12,0  
 H,7,R13,3,A13,1,D13,0  
 H,7,R14,3,A14,13,D14,0

Variables:

R2=1.5406838  
 R3=1.55503403  
 R4=1.09112789  
 R5=1.09112904  
 R6=1.43981599  
 R7=1.54068353  
 R8=1.1091754  
 R9=1.1091743  
 R10=1.09112859  
 R11=1.09112827  
 R12=1.09236919  
 R13=1.10916004  
 R14=1.10919019  
 A3=106.12647112  
 A4=110.39401661  
 A5=110.39194023  
 A6=107.02493407  
 A7=106.12642985  
 A8=116.35863805  
 A9=116.35941116  
 A10=111.38441925  
 A11=111.38463086  
 A12=123.15137605  
 A13=116.36302366  
 A14=116.35515537  
 D4=-120.82688616  
 D5=120.8245417  
 D6=-0.00808189  
 D7=0.00273231  
 D8=-120.47938137  
 D9=120.48295649  
 D10=-120.18307879  
 D11=120.18368486  
 D12=-179.99463814  
 D13=120.49909474  
 D14=119.0376428

1-cyclopropyl-isopropyl cation **10**

E (B3LYP/6-31G(d)) = -156.2964481 Hartree

E (B3LYP/6-31G(d)) + ZPE = -156.1375667 Hartree

NImag = 0

Final B3LYP/6-31G(d) structure in terms of initial Z-matrix:

C  
C,1,r2  
C,2,r3,1,a3  
C,3,r4,2,a4,1,d4,0  
H,4,r5,3,a5,2,d5,0  
H,4,r6,3,a6,2,d6,0  
H,1,r7,2,a7,3,d7,0  
H,1,r8,2,a8,3,d8,0  
H,2,r9,1,a9,3,d9,0  
H,2,r10,1,a10,3,d10,0  
H,3,r11,2,a11,1,d11,0

Variables:

r2=1.42031367  
r3=1.63728612  
a3=66.26423626  
r4=1.3590873  
a4=118.99201238  
d4=-100.46027204  
r5=1.0888385  
a5=121.16124813  
d5=-155.58457767  
r6=1.08869016  
a6=122.02993275  
d6=24.41769704  
r7=1.08727946  
a7=120.95184575  
d7=-93.90025129  
r8=1.08522833  
a8=120.86483706  
d8=102.50429411  
r9=1.08547558  
a9=120.26737076  
d9=-104.38958868  
r10=1.08743654  
a10=120.24383669  
d10=97.27477093  
r11=1.08388048  
a11=115.31149017  
d11=101.9174551



1-cyclopropyl-isopropyl cation **10**

E (MP2/6-31G(d)) = 155.7257500 Hartree

E (MP2/6-31G(d)) + ZPE = -155.5743332 Hartree

NImag = 0

Final MP2/6-31G(d) structure in terms of initial Z-matrix:

C  
C,1,R2  
C,1,R3,2,A3  
H,1,R4,2,A4,3,D4,0  
H,1,R5,2,A5,3,D5,0  
C,3,R6,1,A6,2,D6,0  
H,2,R7,1,A7,3,D7,0  
H,2,R8,1,A8,7,D8,0  
H,3,R9,1,A9,6,D9,0  
H,6,R10,3,A10,1,D10,0  
H,6,R11,3,A11,10,D11,0

Variables:

R2=1.41634038  
R3=1.64815198  
R4=1.08644143  
R5=1.08465345  
R6=1.35734814  
R7=1.08465229  
R8=1.08644471  
R9=1.08331315  
R10=1.08776368  
R11=1.08825628  
A3=64.55212624  
A4=120.53422607  
A5=120.50229298  
A6=116.43907273  
A7=120.50334572  
A8=120.53365734  
A9=115.25339139  
A10=121.19148203  
A11=121.71862559  
D4=-95.47644898  
D5=102.96449167  
D6=103.68643839  
D7=-102.96714625  
D8=-161.55373327  
D9=153.34008757  
D10=151.32272936  
D11=179.99949069

1-cyclopropyl-isopropyl cation **10**

E (MP2/6-31G(d)) = 155.7257500 Hartree

E (MP2/6-31G(d)) + ZPE = -155.5743332 Hartree

NImag = 0

Final MP2/6-31G(d) structure in terms of initial Z-matrix:

C  
C,1,R2  
C,1,R3,2,A3  
H,1,R4,2,A4,3,D4,0  
H,1,R5,2,A5,3,D5,0  
C,3,R6,1,A6,2,D6,0  
H,2,R7,1,A7,3,D7,0  
H,2,R8,1,A8,7,D8,0  
H,3,R9,1,A9,6,D9,0  
H,6,R10,3,A10,1,D10,0  
H,6,R11,3,A11,10,D11,0

Variables:

R2=1.41634038  
R3=1.64815198  
R4=1.08644143  
R5=1.08465345  
R6=1.35734814  
R7=1.08465229  
R8=1.08644471  
R9=1.08331315  
R10=1.08776368  
R11=1.08825628  
A3=64.55212624  
A4=120.53422607  
A5=120.50229298  
A6=116.43907273  
A7=120.50334572  
A8=120.53365734  
A9=115.25339139  
A10=121.19148203  
A11=121.71862559  
D4=-95.47644898  
D5=102.96449167  
D6=103.68643839  
D7=-102.96714625  
D8=-161.55373327  
D9=153.34008757  
D10=151.32272936  
D11=179.99949069

3-methyl-3-pentyl cation 11

E (B3LYP/6-31G(d)) = -236.1885249 Hartree

E (B3LYP/6-31G(d)) + ZPE = -236.0117139 Hartree

NImag = 0

Final B3LYP/6-31G(d) structure in terms of initial Z-matrix:

```

C
C,1,r2
C,2,r3,1,a3
C,2,r4,1,a4,3,d4,0
H,3,r5,2,a5,1,d5,0
H,1,r6,2,a6,3,d6,0
H,1,r7,2,a7,3,d7,0
C,1,r8,2,a8,3,d8,0
H,4,r9,2,a9,1,d9,0
C,4,r10,2,a10,1,d10,0
H,4,r11,2,a11,1,d11,0
H,8,r12,1,a12,2,d12,0
H,8,r13,1,a13,2,d13,0
H,8,r14,1,a14,2,d14,0
H,10,r15,4,a15,2,d15,0
H,10,r16,4,a16,2,d16,0
H,10,r17,4,a17,2,d17,0
H,3,r18,2,a18,1,d18,0
H,3,r19,2,a19,1,d19,0

```

Variables:

```

r2=1.46484129
r3=1.47238753
a3=119.48083782
r4=1.46534642
a4=120.08668158
d4=-178.52353019
r5=1.09647265
a5=111.72597873
d5=33.70229097
r6=1.09464744
a6=111.47424843
d6=150.32051602
r7=1.09390341
a7=112.24137935
d7=25.55267519
r8=1.58088086
a8=105.96732933
d8=-92.5831125
r9=1.09451712
a9=111.61842573
d9=-143.93991643
r10=1.58070432
a10=106.61802934
d10=98.52481605
r11=1.09352145
a11=111.72084932
d11=-19.66943373
r12=1.09228531
a12=111.71287015
d12=-61.25850722
r13=1.09299023
a13=106.32819027
d13=-179.77566217
r14=1.09237187
a14=111.62459402
d14=61.79289321
r15=1.09282507
a15=106.44310496
d15=-177.43878475
r16=1.09207441
a16=111.47818255
d16=64.02526068
r17=1.09275667

```

a17=111.64254618  
d17=-59.05945376  
r18=1.10663956  
a18=106.21396302  
d18=-79.86982598  
r19=1.09161942  
a19=114.08405253  
d19=161.15573367

3-methyl-3-pentyl cation 11

E (MP2/6-31G(d)) = -235.2807201 Hartree

E (MP2/6-31G(d)) + ZPE = -235.1003041 Hartree

NImag = 0

Final MP2/6-31G(d) structure in terms of initial Z-matrix:

C  
C,1,R2  
H,1,R3,2,A3  
H,1,R4,2,A4,3,D4,0  
C,1,R5,2,A5,3,D5,0  
C,2,R6,1,A6,3,D6,0  
C,2,R7,1,A7,6,D7,0  
H,5,R8,1,A8,2,D8,0  
H,5,R9,1,A9,8,D9,0  
H,5,R10,1,A10,8,D10,0  
H,6,R11,2,A11,1,D11,0  
H,7,R12,2,A12,1,D12,0  
C,7,R13,2,A13,12,D13,0  
H,7,R14,2,A14,12,D14,0  
H,6,R15,2,A15,11,D15,0  
H,6,R16,2,A16,11,D16,0  
H,13,R17,7,A17,2,D17,0  
H,13,R18,7,A18,17,D18,0  
H,13,R19,7,A19,17,D19,0

Variables:

R2=1.45550011  
R3=1.09302906  
R4=1.09244836  
R5=1.57418169  
R6=1.46843562  
R7=1.45588933  
R8=1.09088509  
R9=1.09164806  
R10=1.09087371  
R11=1.09460508  
R12=1.09270076  
R13=1.57410963  
R14=1.09206011  
R15=1.10441613  
R16=1.09006197  
R17=1.09141109  
R18=1.09043609  
R19=1.09160398  
A3=112.00582975  
A4=112.73734141  
A5=103.52522975  
A6=119.49912314  
A7=120.0451235  
A8=111.6707494  
A9=106.21509022  
A10=111.71703727  
A11=111.35539143  
A12=112.25925872  
A13=104.01781423  
A14=112.17534475  
A15=105.75096212  
A16=113.76199318  
A17=106.36649913  
A18=111.32828279  
A19=111.74144609  
D4=-126.08471437  
D5=116.41751886  
D6=151.20918326  
D7=-178.00050287  
D8=-61.51979092  
D9=-118.3764561  
D10=123.31476862  
D11=34.18426894  
D12=-144.6592658

D13=-116.89320827  
D14=125.65476367  
D15=-113.80002202  
D16=126.99638132  
D17=-175.09446704  
D18=-118.44481483  
D19=118.27359744

Final structure in terms of initial Z-matrix:

C  
C,1,R2  
H,1,R3,2,A3  
H,1,R4,2,A4,3,D4,0  
C,1,R5,2,A5,3,D5,0  
C,2,R6,1,A6,3,D6,0  
C,2,R7,1,A7,6,D7,0  
H,5,R8,1,A8,2,D8,0  
H,5,R9,1,A9,8,D9,0  
H,5,R10,1,A10,8,D10,0  
H,6,R11,2,A11,1,D11,0  
H,7,R12,2,A12,1,D12,0  
C,7,R13,2,A13,12,D13,0  
H,7,R14,2,A14,12,D14,0  
H,6,R15,2,A15,11,D15,0  
H,6,R16,2,A16,11,D16,0  
H,13,R17,7,A17,2,D17,0  
H,13,R18,7,A18,17,D18,0  
H,13,R19,7,A19,17,D19,0

Variables:

R2=1.45550011  
R3=1.09302906  
R4=1.09244836  
R5=1.57418169  
R6=1.46843562  
R7=1.45588933  
R8=1.09088509  
R9=1.09164806  
R10=1.09087371  
R11=1.09460508  
R12=1.09270076  
R13=1.57410963  
R14=1.09206011  
R15=1.10441613  
R16=1.09006197  
R17=1.09141109  
R18=1.09043609  
R19=1.09160398  
A3=112.00582975  
A4=112.73734141  
A5=103.52522975  
A6=119.49912314  
A7=120.0451235  
A8=111.6707494  
A9=106.21509022  
A10=111.71703727  
A11=111.35539143  
A12=112.25925872  
A13=104.01781423  
A14=112.17534475  
A15=105.75096212  
A16=113.76199318  
A17=106.36649913  
A18=111.32828279  
A19=111.74144609  
D4=-126.08471437  
D5=116.41751886  
D6=151.20918326  
D7=-178.00050287  
D8=-61.51979092  
D9=-118.3764561  
D10=123.31476862  
D11=34.18426894  
D12=-144.6592658  
D13=-116.89320827  
D14=125.65476367

D15=-113.80002202  
D16=126.99638132  
D17=-175.09446704  
D18=-118.44481483  
D19=118.27359744

2,4-dimethyl-2-pentyl cation 12

E (B3LYP/6-31G(d)) = -275.5043225 Hartree

E (B3LYP/6-31G(d)) + ZPE = -275.3003235 Hartree

NImag = 0

Final B3LYP/6-31G(d) structure in terms of initial Z-matrix:

C  
C,1,R2  
H,1,R3,2,A3  
H,1,R4,2,A4,3,D4,0  
H,1,R5,2,A5,3,D5,0  
C,2,R6,1,A6,3,D6,0  
C,2,R7,1,A7,6,D7,0  
C,7,R8,2,A8,1,D8,0  
H,7,R9,2,A9,8,D9,0  
H,7,R10,2,A10,8,D10,0  
H,6,R11,2,A11,1,D11,0  
H,6,R12,2,A12,11,D12,0  
H,6,R13,2,A13,11,D13,0  
C,8,R14,7,A14,2,D14,0  
C,8,R15,7,A15,14,D15,0  
H,8,R16,7,A16,14,D16,0  
H,14,R17,8,A17,7,D17,0  
H,14,R18,8,A18,17,D18,0  
H,14,R19,8,A19,17,D19,0  
H,15,R20,8,A20,7,D20,0  
H,15,R21,8,A21,20,D21,0  
H,15,R22,8,A22,20,D22,0

Variables:

R2=1.47164939  
R3=1.09495106  
R4=1.10795607  
R5=1.09271546  
R6=1.47291037  
R7=1.44916365  
R8=1.62743646  
R9=1.0949221  
R10=1.09319388  
R11=1.09061426  
R12=1.10397252  
R13=1.10024978  
R14=1.53300996  
R15=1.52940405  
R16=1.09593459  
R17=1.09561774  
R18=1.0941631  
R19=1.09529908  
R20=1.09486142  
R21=1.09661327  
R22=1.09570734  
A3=112.34938923  
A4=105.27655528  
A5=114.0296363  
A6=118.8930817  
A7=120.52845475  
A8=109.22439847  
A9=110.7567327  
A10=112.81306845  
A11=114.15781127  
A12=108.06066811  
A13=109.93329872  
A14=106.49942788  
A15=112.37888891  
A16=106.45360585  
A17=108.69493678  
A18=112.11155737  
A19=111.51081603  
A20=109.07884256



A21=111.56662182  
A22=113.21072963  
D4=114.01010287  
D5=-128.64781169  
D6=147.890249  
D7=-178.76361491  
D8=102.18401656  
D9=115.25643917  
D10=-119.3242738  
D11=171.95255217  
D12=122.14417274  
D13=-124.80966872  
D14=173.67237814  
D15=123.29578331  
D16=-116.36169275  
D17=-177.59866468  
D18=119.21207573  
D19=-118.72361658  
D20=-174.95187421  
D21=118.16659693  
D22=-119.03669863

2,4-dimethyl-2-pentyl cation 12

E (MP2/6-31G(d)) = -274.4500894 Hartree

E (MP2/6-31G(d)) + ZPE = -274.26566464

NImag = 0

Final MP2/6-31G(d) structure in terms of initial Z-matrix:

C  
C,1,R2  
H,1,R3,2,A3  
H,1,R4,2,A4,3,D4,0  
H,1,R5,2,A5,3,D5,0  
C,2,R6,1,A6,3,D6,0  
C,2,R7,1,A7,6,D7,0  
C,7,R8,2,A8,1,D8,0  
H,7,R9,2,A9,8,D9,0  
H,7,R10,2,A10,8,D10,0  
H,6,R11,2,A11,1,D11,0  
H,6,R12,2,A12,11,D12,0  
H,6,R13,2,A13,11,D13,0  
C,8,R14,7,A14,2,D14,0  
C,8,R15,7,A15,14,D15,0  
H,8,R16,7,A16,14,D16,0  
H,14,R17,8,A17,7,D17,0  
H,14,R18,8,A18,17,D18,0  
H,14,R19,8,A19,17,D19,0  
H,15,R20,8,A20,7,D20,0  
H,15,R21,8,A21,20,D21,0  
H,15,R22,8,A22,20,D22,0

Variables:

R2=1.46532815  
R3=1.09159163  
R4=1.107483  
R5=1.09187468  
R6=1.46864465  
R7=1.43912973  
R8=1.61251064  
R9=1.09349634  
R10=1.09230883  
R11=1.08934124  
R12=1.10281952  
R13=1.09723288  
R14=1.52772469  
R15=1.52420369  
R16=1.09546351  
R17=1.09382385  
R18=1.09265138  
R19=1.09350708  
R20=1.09308082  
R21=1.09489732  
R22=1.09435253  
A3=112.82410901  
A4=103.72757346  
A5=113.7020581  
A6=118.796669  
A7=120.69869442  
A8=105.64240619  
A9=111.93830118  
A10=113.43485338  
A11=113.75481603  
A12=107.08668959  
A13=110.11961649  
A14=106.09149278  
A15=112.75997884  
A16=106.80128622  
A17=108.74044407  
A18=111.92852107  
A19=110.96851872  
A20=108.9609551  
A21=111.05974557

A22=113.38718421  
D4=114.55049839  
D5=-129.35384622  
D6=152.81069866  
D7=-178.03750217  
D8=102.08388279  
D9=114.49197984  
D10=-117.90842831  
D11=168.61026966  
D12=121.14510507  
D13=-125.2944021  
D14=177.72103183  
D15=122.60409052  
D16=-116.38470173  
D17=-176.9968342  
D18=119.4060272  
D19=-118.7619553  
D20=-173.76827388  
D21=118.11501856  
D22=-119.19280899

2,3-dimethyl-2-butyl cation 13

E (B3LYP/6-31G(d)) = -236.1885221 Hartree

E (B3LYP/6-31G(d)) + ZPE = -236.0130191 Hartree

NImag = 0

Final B3LYP/6-31G(d) structure in terms of initial Z-matrix:

H  
C,1,R2  
H,2,R3,1,A3  
C,2,R4,1,A4,3,D4,0  
H,2,R5,1,A5,3,D5,0  
C,4,R6,2,A6,1,D6,0  
C,4,R7,2,A7,6,D7,0  
H,7,R8,4,A8,2,D8,0  
H,7,R9,4,A9,8,D9,0  
H,7,R10,4,A10,8,D10,0  
H,6,R11,4,A11,2,D11,0  
C,6,R12,4,A12,11,D12,0  
C,6,R13,4,A13,11,D13,0  
H,13,R14,6,A14,4,D14,0  
H,12,R15,6,A15,4,D15,0  
H,12,R16,6,A16,15,D16,0  
H,12,R17,6,A17,15,D17,0  
H,13,R18,6,A18,14,D18,0  
H,13,R19,6,A19,14,D19,0

Variables:

R2=1.08343633  
R3=1.07985387  
R4=1.4758045  
R5=1.09412545  
R6=1.47603607  
R7=1.47680286  
R8=1.09274519  
R9=1.08276654  
R10=1.07981324  
R11=1.08446274  
R12=1.56955663  
R13=1.53182821  
R14=1.08403591  
R15=1.0827608  
R16=1.0828009  
R17=1.08203444  
R18=1.08241211  
R19=1.08295658  
A3=111.47661881  
A4=111.75476267  
A5=106.38546048  
A6=119.68162643  
A7=118.82419427  
A8=105.7195508  
A9=111.82234876  
A10=113.06375529  
A11=108.03247856  
A12=103.31790711  
A13=116.31402219  
A14=111.7246166  
A15=112.80991356  
A16=111.52608631  
A17=106.73587627  
A18=108.54813309  
A19=112.44342324  
D4=-127.97457283  
D5=117.8561683  
D6=138.23873467  
D7=179.45024032  
D8=-100.97529108  
D9=-115.09817706  
D10=118.68732994  
D11=25.68840592

D12=-112.96974491  
D13=124.50557272  
D14=-58.98473433  
D15=56.8826732  
D16=-123.44320179  
D17=118.47454744  
D18=-118.41272716  
D19=122.65877845

2,3-dimethyl-2-butyl cation 13

E (B3LYP/6-31G(d)) = -236.1885221 Hartree

E (B3LYP/6-31G(d)) + ZPE = -236.0130191 Hartree

NImag = 0

Final B3LYP/6-31G(d) structure in terms of initial Z-matrix:

H  
C,1,R2  
H,2,R3,1,A3  
C,2,R4,1,A4,3,D4,0  
H,2,R5,1,A5,3,D5,0  
C,4,R6,2,A6,1,D6,0  
C,4,R7,2,A7,6,D7,0  
H,7,R8,4,A8,2,D8,0  
H,7,R9,4,A9,8,D9,0  
H,7,R10,4,A10,8,D10,0  
H,6,R11,4,A11,2,D11,0  
C,6,R12,4,A12,11,D12,0  
C,6,R13,4,A13,11,D13,0  
H,13,R14,6,A14,4,D14,0  
H,12,R15,6,A15,4,D15,0  
H,12,R16,6,A16,15,D16,0  
H,12,R17,6,A17,15,D17,0  
H,13,R18,6,A18,14,D18,0  
H,13,R19,6,A19,14,D19,0

Variables:

R2=1.08343633  
R3=1.07985387  
R4=1.4758045  
R5=1.09412545  
R6=1.47603607  
R7=1.47680286  
R8=1.09274519  
R9=1.08276654  
R10=1.07981324  
R11=1.08446274  
R12=1.56955663  
R13=1.53182821  
R14=1.08403591  
R15=1.0827608  
R16=1.0828009  
R17=1.08203444  
R18=1.08241211  
R19=1.08295658  
A3=111.47661881  
A4=111.75476267  
A5=106.38546048  
A6=119.68162643  
A7=118.82419427  
A8=105.7195508  
A9=111.82234876  
A10=113.06375529  
A11=108.03247856  
A12=103.31790711  
A13=116.31402219  
A14=111.7246166  
A15=112.80991356  
A16=111.52608631  
A17=106.73587627  
A18=108.54813309  
A19=112.44342324  
D4=-127.97457283  
D5=117.8561683  
D6=138.23873467  
D7=179.45024032  
D8=-100.97529108  
D9=-115.09817706  
D10=118.68732994  
D11=25.68840592

D12=-112.96974491  
D13=124.50557272  
D14=-58.98473433  
D15=56.8826732  
D16=-123.44320179  
D17=118.47454744  
D18=-118.41272716  
D19=122.65877845

2,3-dimethyl-2-butyl cation 13

E (MP2/6-31G(d)) = -235.282151 Hartree

E (MP2/6-31G(d)) + ZPE = -235.1397889 Hartree

NImag = 0

Final MP2/6-31G(d) structure in terms of initial Z-matrix:

H  
C,1,R2  
H,2,R3,1,A3  
C,2,R4,1,A4,3,D4,0  
H,2,R5,1,A5,3,D5,0  
C,4,R6,2,A6,1,D6,0  
C,4,R7,2,A7,6,D7,0  
H,7,R8,4,A8,2,D8,0  
H,7,R9,4,A9,8,D9,0  
H,7,R10,4,A10,8,D10,0  
H,6,R11,4,A11,2,D11,0  
C,6,R12,4,A12,11,D12,0  
C,6,R13,4,A13,11,D13,0  
H,13,R14,6,A14,4,D14,0  
H,12,R15,6,A15,4,D15,0  
H,12,R16,6,A16,15,D16,0  
H,12,R17,6,A17,15,D17,0  
H,13,R18,6,A18,14,D18,0  
H,13,R19,6,A19,14,D19,0

Variables:

R2=1.10442247  
R3=1.08936587  
R4=1.46870453  
R5=1.09576503  
R6=1.44661985  
R7=1.46925219  
R8=1.09222891  
R9=1.1050819  
R10=1.09047421  
R11=1.09412111  
R12=1.5239101  
R13=1.59288072  
R14=1.09079696  
R15=1.09333847  
R16=1.0928472  
R17=1.09190934  
R18=1.09277994  
R19=1.09192948  
A3=108.64953221  
A4=105.65124484  
A5=105.26496303  
A6=120.09257035  
A7=118.71731579  
A8=112.63668055  
A9=105.02802321  
A10=113.38854255  
A11=110.13219917  
A12=118.47538645  
A13=98.31336918  
A14=113.21055583  
A15=111.1008657  
A16=112.31752903  
A17=108.76479441  
A18=104.32964612  
A19=111.27444835  
D4=-122.36853287  
D5=119.65477611  
D6=114.02538741  
D7=179.85063686  
D8=-146.72423943  
D9=-114.26914366  
D10=127.63109531



D11=-24.14478352  
D12=-130.45799358  
D13=110.18481696  
D14=-58.82975111  
D15=62.05420605  
D16=-122.24593168  
D17=118.6087885  
D18=-117.96548056  
D19=124.77635747

2,3,3-trimethyl-2-butyl cation **14**

E (B3LYP/6-31G(d)) = -275.5013985 Hartree

E (B3LYP/6-31G(d)) + ZPE = -275.3037666 Hartree

NImag = 0

Final B3LYP/6-31G(d) structure in terms of initial Z-matrix:

C  
C,1,R2  
H,1,R3,2,A3  
H,1,R4,2,A4,3,D4,0  
H,1,R5,2,A5,3,D5,0  
C,2,R6,1,A6,3,D6,0  
C,2,R7,1,A7,6,D7,0  
C,7,R8,2,A8,1,D8,0  
C,7,R9,2,A9,8,D9,0  
C,7,R10,2,A10,8,D10,0  
H,6,R11,2,A11,1,D11,0  
H,6,R12,2,A12,11,D12,0  
H,6,R13,2,A13,11,D13,0  
H,8,R14,7,A14,2,D14,0  
H,8,R15,7,A15,14,D15,0  
H,8,R16,7,A16,14,D16,0  
H,9,R17,7,A17,2,D17,0  
H,9,R18,7,A18,17,D18,0  
H,9,R19,7,A19,17,D19,0  
H,10,R20,7,A20,2,D20,0  
H,10,R21,7,A21,20,D21,0  
H,10,R22,7,A22,20,D22,0

Variables:

R2=1.47387398  
R3=1.08847482  
R4=1.0958448  
R5=1.10762956  
R6=1.47742119  
R7=1.47133331  
R8=1.54042064  
R9=1.60427557  
R10=1.54685882  
R11=1.09694429  
R12=1.1038707  
R13=1.09059278  
R14=1.09307684  
R15=1.09543024  
R16=1.09318767  
R17=1.09501217  
R18=1.09266365  
R19=1.09213589  
R20=1.09329207  
R21=1.09216999  
R22=1.09461745  
A3=115.23687232  
A4=111.54874833  
A5=105.3261204  
A6=116.91157511  
A7=122.11348831  
A8=114.95486397  
A9=98.46998044  
A10=114.73085063  
A11=111.64969637  
A12=107.39871184  
A13=113.54000264  
A14=108.99814596  
A15=111.02670714  
A16=113.227818  
A17=104.23151656  
A18=112.6188865  
A19=112.6558818  
A20=108.40592443  
A21=113.57289016

A22=110.80663424  
D4=128.3500912  
D5=-118.30671085  
D6=-168.20056939  
D7=179.51654337  
D8=161.32922136  
D9=115.41143096  
D10=-129.67056204  
D11=135.15705567  
D12=113.79678113  
D13=-125.41763553  
D14=175.68986801  
D15=118.25501602  
D16=-119.33302504  
D17=-179.0580324  
D18=117.36427478  
D19=-117.61176643  
D20=-175.65487131  
D21=119.19982148  
D22=-118.11615445

2,3,3-trimethyl-2-butyl cation 14

E (MP2/6-31G(d)) = -274.4516058 Hartree

E (MP2/6-31G(d)) + ZPE = -274.2437418 Hartree

NImag = 0

Final MP2/6-31G(d) structure in terms of initial Z-matrix:

C  
C,1,R2  
H,1,R3,2,A3  
H,1,R4,2,A4,3,D4,0  
H,1,R5,2,A5,3,D5,0  
C,2,R6,1,A6,3,D6,0  
C,2,R7,1,A7,6,D7,0  
C,7,R8,2,A8,1,D8,0  
C,7,R9,2,A9,8,D9,0  
C,7,R10,2,A10,8,D10,0  
H,6,R11,2,A11,1,D11,0  
H,6,R12,2,A12,11,D12,0  
H,6,R13,2,A13,11,D13,0  
H,8,R14,7,A14,2,D14,0  
H,8,R15,7,A15,14,D15,0  
H,8,R16,7,A16,14,D16,0  
H,9,R17,7,A17,2,D17,0  
H,9,R18,7,A18,17,D18,0  
H,9,R19,7,A19,17,D19,0  
H,10,R20,7,A20,2,D20,0  
H,10,R21,7,A21,20,D21,0  
H,10,R22,7,A22,20,D22,0

Variables:

R2=1.472  
R3=1.08629784  
R4=1.09381397  
R5=1.1052226  
R6=1.47580656  
R7=1.44988551  
R8=1.52945382  
R9=1.60307798  
R10=1.5328131  
R11=1.09209707  
R12=1.10309066  
R13=1.08991284  
R14=1.09274379  
R15=1.09475888  
R16=1.09084646  
R17=1.09429292  
R18=1.09170326  
R19=1.09209203  
R20=1.09252048  
R21=1.09039121  
R22=1.09344593  
A3=115.11124646  
A4=111.33771468  
A5=104.67540033  
A6=116.6518629  
A7=122.2649556  
A8=115.74642375  
A9=95.01102878  
A10=116.13760397  
A11=112.70755159  
A12=105.75756775  
A13=113.0374551  
A14=108.76570738  
A15=110.53181079  
A16=113.32326547  
A17=102.74475662  
A18=113.04393631  
A19=112.79744745  
A20=108.31430371  
A21=113.44268421  
A22=110.54451489

D4=128.01085323  
D5=-118.37904143  
D6=-170.10674658  
D7=-179.813065  
D8=159.81184728  
D9=113.91401034  
D10=-132.56441502  
D11=141.72852193  
D12=114.70166588  
D13=-126.34928978  
D14=173.47868106  
D15=118.08025877  
D16=-119.52824099  
D17=-179.15413346  
D18=116.88594295  
D19=-116.94910571  
D20=-175.56169534  
D21=119.16440418  
D22=-118.05726737

Methyl-cyclopropyl cation **15**

E (B3LYP/6-31G(d)) = -156.2964490 Hartree

E (B3LYP/6-31G(d)) + ZPE = -156.198791 Hartree

NImag = 0

Final B3LYP/6-31G(d) structure in terms of initial Z-matrix:

C  
C,1,R2  
C,1,R3,2,A3  
H,1,R4,2,A4,3,D4,0  
H,1,R5,2,A5,3,D5,0  
C,3,R6,1,A6,2,D6,0  
H,2,R7,1,A7,3,D7,0  
H,2,R8,1,A8,7,D8,0  
H,3,R9,1,A9,6,D9,0  
H,6,R10,3,A10,1,D10,0  
H,6,R11,3,A11,10,D11,0

Variables:

R2=1.42000035  
R3=1.65910277  
R4=1.08728285  
R5=1.08614226  
R6=1.35916629  
R7=1.08479537  
R8=1.08801149  
R9=1.08422322  
R10=1.0881034  
R11=1.08856235  
A3=64.68102653  
A4=120.66648578  
A5=120.56737831  
A6=117.37556414  
A7=120.62664913  
A8=120.57543917  
A9=114.88212326  
A10=122.0466671  
A11=121.11626899  
D4=-95.57469679  
D5=103.37117392  
D6=104.15238639  
D7=-103.34619911  
D8=-161.13708794  
D9=153.12176263  
D10=-28.8102576  
D11=180.

methyl-cyclopropyl cation **15**

E (MP2/6-31G(d)) = -155.7257500 Hartree

E (MP2/6-31G(d)) + ZPE = -155.626001 Hartree

NImag = 0

Final MP2/6-31G(d) structure in terms of initial Z-matrix:

C  
C,1,R2  
C,1,R3,2,A3  
H,1,R4,2,A4,3,D4,0  
H,1,R5,2,A5,3,D5,0  
C,3,R6,1,A6,2,D6,0  
H,2,R7,1,A7,3,D7,0  
H,2,R8,1,A8,7,D8,0  
H,3,R9,1,A9,6,D9,0  
H,6,R10,3,A10,1,D10,0  
H,6,R11,3,A11,10,D11,0

Variables:

R2=1.45200034  
R3=1.58797859  
R4=1.11203957  
R5=1.10923307  
R6=1.37864607  
R7=1.10872404  
R8=1.11150394  
R9=1.11475423  
R10=1.10808438  
R11=1.10863249  
A3=62.81210991  
A4=120.86610698  
A5=120.58249588  
A6=119.46736692  
A7=120.61557606  
A8=120.82091235  
A9=115.35394955  
A10=122.27933972  
A11=121.40130502  
D4=-101.94501095  
D5=106.01032822  
D6=106.84534029  
D7=-106.00167411  
D8=-152.12962712  
D9=149.01681348  
D10=-31.61490169  
D11=179.9388411

1-adamantyl cation 16

E (B3LYP/6-31G(d)) = -389.8382296 Hartree

E (B3LYP/6-31G(d)) + ZPE = --389.7650237 Hartree

NImag = 0

Final B3LYP/6-31G(d) structure in terms of initial Z-matrix:

C  
C,1,R2  
C,2,R3,1,A3  
C,3,R4,2,A4,1,D4,0  
C,3,R5,2,A5,4,D5,0  
C,4,R6,3,A6,2,D6,0  
C,6,R7,4,A7,3,D7,0  
C,5,R8,3,A8,2,D8,0  
H,4,R9,3,A9,6,D9,0  
H,4,R10,3,A10,6,D10,0  
H,3,R11,2,A11,4,D11,0  
H,5,R12,3,A12,8,D12,0  
H,5,R13,3,A13,8,D13,0  
C,1,R14,2,A14,3,D14,0  
H,6,R15,4,A15,7,D15,0  
H,7,R16,6,A16,4,D16,0  
H,7,R17,6,A17,16,D17,0  
C,1,R18,2,A18,14,D18,0  
H,8,R19,5,A19,3,D19,0  
H,2,R20,1,A20,3,D20,0  
H,2,R21,1,A21,3,D21,0  
H,14,R22,1,A22,2,D22,0  
H,14,R23,1,A23,22,D23,0  
H,18,R24,1,A24,2,D24,0  
H,18,R25,1,A25,24,D25,0

Variables:

R2=1.4586687  
R3=1.62859615  
R4=1.53565806  
R5=1.53572421  
R6=1.53571404  
R7=1.53546976  
R8=1.5358498  
R9=1.09604429  
R10=1.09680367  
R11=1.09438799  
R12=1.0968579  
R13=1.09600209  
R14=1.4588632  
R15=1.09443311  
R16=1.09610736  
R17=1.09682144  
R18=1.45862423  
R19=1.09440768  
R20=1.09168129  
R21=1.09168873  
R22=1.09171399  
R23=1.09167761  
R24=1.09163227  
R25=1.09170465  
A3=98.93373245  
A4=108.14040991  
A5=108.12171081  
A6=109.83665294  
A7=111.48397669  
A8=109.82752973  
A9=110.81780943  
A10=109.44250675  
A11=105.31900979  
A12=109.43735186  
A13=110.79373865  
A14=117.7666149



A15=111.75780229  
A16=110.7684368  
A17=109.47487595  
A18=117.78809157  
A19=111.74160893  
A20=114.2230165  
A21=114.24998877  
A22=114.20343999  
A23=114.20801747  
A24=114.24090761  
A25=114.21483047  
D4=60.395943  
D5=-120.76280847  
D6=-61.63884914  
D7=-57.02220267  
D8=61.64956148  
D9=122.71425824  
D10=-120.16288184  
D11=119.62228748  
D12=120.18367668  
D13=-122.69807294  
D14=-75.44203835  
D15=-125.8973986  
D16=179.61663691  
D17=117.10031233  
D18=150.89397766  
D19=-177.14575234  
D20=115.24993668  
D21=-115.2939583  
D22=-169.29239327  
D23=129.44545768  
D24=169.24418025  
D25=-129.48561024

1-adamantyl cation **16**

E (MP2/6-31G(d)) = -388.4670908 Hartree

E (MP2/6-31G(d)) + ZPE = -388.230484 Hartree

NImag = 0

Final MP2/6-31G(d) structure in terms of initial Z-matrix:

C  
C,1,R2  
C,1,R3,2,A3  
C,1,R4,2,A4,3,D4,0  
C,2,R5,1,A5,3,D5,0  
C,3,R6,1,A6,2,D6,0  
C,4,R7,1,A7,2,D7,0  
H,2,R8,1,A8,5,D8,0  
H,2,R9,1,A9,5,D9,0  
H,3,R10,1,A10,6,D10,0  
H,3,R11,1,A11,6,D11,0  
H,4,R12,1,A12,7,D12,0  
H,4,R13,1,A13,7,D13,0  
C,5,R14,2,A14,1,D14,0  
C,5,R15,2,A15,14,D15,0  
C,6,R16,3,A16,1,D16,0  
H,5,R17,2,A17,14,D17,0  
H,6,R18,3,A18,16,D18,0  
H,7,R19,4,A19,1,D19,0  
H,14,R20,5,A20,2,D20,0  
H,14,R21,5,A21,20,D21,0  
H,15,R22,5,A22,2,D22,0  
H,15,R23,5,A23,22,D23,0  
H,16,R24,6,A24,3,D24,0  
H,16,R25,6,A25,24,D25,0

Variables:

R2=1.45008266  
R3=1.45009144  
R4=1.44998314  
R5=1.61875228  
R6=1.61868868  
R7=1.61881562  
R8=1.09172889  
R9=1.09173856  
R10=1.09174531  
R11=1.09173186  
R12=1.09174245  
R13=1.09174653  
R14=1.52650934  
R15=1.52644852  
R16=1.52643708  
R17=1.0959508  
R18=1.09594653  
R19=1.09594028  
R20=1.09627715  
R21=1.09707885  
R22=1.0970899  
R23=1.09627976  
R24=1.09627917  
R25=1.09709496  
A3=118.0719845  
A4=118.05522624  
A5=98.26227013  
A6=98.2593172  
A7=98.26552769  
A8=114.3244074  
A9=114.3268612  
A10=114.32885621  
A11=114.32980472  
A12=114.3334248  
A13=114.33167253  
A14=108.23092845  
A15=108.21619998  
A16=108.23524452

A17=105.11617595  
A18=105.12489698  
A19=105.10080159  
A20=110.81167736  
A21=109.40369834  
A22=109.39574939  
A23=110.81847454  
A24=110.81662871  
A25=109.39939603  
D4=152.65855447  
D5=-76.32264506  
D6=76.32877928  
D7=-76.32866559  
D8=114.90685125  
D9=-114.89250722  
D10=114.91072158  
D11=-114.87636749  
D12=-114.89603537  
D13=114.89303498  
D14=60.47881168  
D15=-120.98413557  
D16=60.49235655  
D17=119.51318443  
D18=119.50813509  
D19=179.99963803  
D20=60.88192302  
D21=117.33130011  
D22=-178.19804599  
D23=117.32993635  
D24=60.88434469  
D25=117.33090779
